1 **Plastid EF-Tu Regulates Root Development through Both the ATM Pathway and**  
2 **GUN1**

3 **Pengcheng Li<sup>1</sup>, Junjie Ma<sup>3</sup>, Xueping Sun<sup>2</sup>, Chuanzhi Zhao<sup>1</sup>, Changle Ma<sup>2</sup>,**  
4 **Xingjun Wang<sup>1</sup>**

5 <sup>1</sup>Biotechnology Research Center, Shandong Academy of Agricultural Sciences;  
6 Shandong Provincial Key Laboratory of Crop Genetic Improvement, Ecology and  
7 Physiology, Jinan 250100, PR China

8 <sup>2</sup>College of Life Sciences, Shandong Normal University, Jinan 250014, PR China

9 <sup>3</sup>College of Life Science, Shandong University, Qingdao 266237, PR China

10 Corresponding authors: Pengcheng Li (lpcsas@outlook.com) and Xingjun Wang  
11 (xingjunw@hotmail.com)

12

13 **Short title:** ATM and GUN1 mediate the *rab8d* signal

14

15 **One-sentence summary:** The *rab8d*-dependent plastid signal mediated by ATM and  
16 GUN1 regulates the root meristem size and renewal of root stem cells, respectively.

17

18 The author responsible for distribution of materials integral to the findings presented  
19 in this article in accordance with the policy described in the Instructions for Authors  
20 (www.plantcell.org) is: Pengcheng Li (lpcsas@outlook.com).

21

## 22 ABSTRACT

23 Impaired plastid translation affects various aspects of plant development, but the  
24 molecular mechanism remains elusive. Here, we described that the reduced function  
25 of plastid translation elongation factor EF-Tu encoded by *RAB GTPASE HOMOLOG*  
26 *8D (Rab8d)* elicits defects in root development, including the reduced meristem size,  
27 programmed cell death (PCD) in the stem cell niche (SCN), and quiescent center (QC)  
28 division. We found that the ATAXIA-TELANGIECTASIA-MUTATED  
29 (ATM)-SUPPRESSOR OF GAMMA RESPONSE 1 module mediated overexpression  
30 of *SIAMSE-RELATED 5* in the root meristem region is responsible for the reduced  
31 meristem size in the *rab8d* mutant through arresting the cell cycle. The QC activation  
32 in *rab8d* is dependent on *ETHYLENE RESPONSE FACTOR 115*, which expression is  
33 tightly associated with the PCD in SCN. We further found that Rab8d physically  
34 interacts with GENOME UNCOUPLED 1 (GUN1), and GUN1 is required for  
35 inducing PCD in the *rab8d* SCN. However, the loss of GUN1 function in *rab8d*  
36 severely impairs the root architecture, suggesting that the GUN1-mediated renewal of  
37 stem cells is essential for maintaining root growth. Our observations extend our  
38 knowledge on the roles of ATM and GUN1 in regulating root development through  
39 mediating plastid translation dependent signals.

## 40 INTRODUCTION

41 Plant root development requires an incessant generation of different types of  
42 cells by the pluripotent stem cells. In the root apical meristem (RAM), the stem cell  
43 niche (SCN) is comprised of a group of (usually four) specialized organizer cells,  
44 which divide slowly and are called the quiescent center (QC) as a consequence, and  
45 their surrounding stem cells. The QC cells are generated from a small lens-shaped  
46 daughter cell of the hypophysis at the globular stage of embryogenesis (Scheres et al.,  
47 1994). Later, the mitotically inactive QC induces their adjacent cells to become the  
48 root stem cells (van den Berg et al., 1997).

49 The phytohormone auxin plays a fundamental role in the establishment of root  
50 SCN. At early stages of embryogenesis, the suspensor transports the maternal auxin to

51 the apical cell through several transport facilitators (Moller and Weijers, 2009; Robert  
52 et al., 2013; Robert et al., 2018). These proteins including PINFORMEDs (PINs) are  
53 required for the auxin dynamic distribution in the embryo proper, which determines  
54 the architectures of embryo and future seedling (Friml et al., 2003). At the  
55 mid-globular stage, an auxin maximum is observed in the hypophysis and the  
56 uppermost suspensor cells (Friml et al., 2003). This maximum is key for the division  
57 pattern of hypophysis and the subsequent formation of root QC (Friml et al., 2002;  
58 Blilou et al., 2005). At postembryonic stages, the stable auxin maximum present in the  
59 root QC is considered to be a positional cue for the SCN (Sabatini et al., 1999).

60 In postembryonic roots, two parallel molecular pathways have been proven to be  
61 involved in the SCN maintenance, namely, the PLETHORA (PLT) and  
62 SCARECROW (SCR) pathways. The PLT proteins belong to the APETALA2  
63 (AP2)-domain transcription factor family and have four members which function  
64 redundantly in root development (Aida et al., 2004; Galinha et al., 2007). Their  
65 distribution is gradient along the RAM region with a maximum in the SCN, which is  
66 important for determination of the RAM size (Galinha et al., 2007). The  
67 loss-of-function mutants of *PLTs* display an abnormal division pattern in the  
68 hypophysis of embryo and a severely impaired RAM formation at the seedling stage  
69 (Galinha et al., 2007). The SCR pathway involves the intercellular movement of  
70 SHORT ROOT (SHR) from stele to the *SCR* expression domain and the  
71 transcriptional regulation by the SHR-SCR module (Nakajima et al., 2001; Sabatini et  
72 al., 2003). *SCR* is specifically expressed in the QC, cortex/endodermis stem cells, and  
73 the entire endodermal cell layer. In these cells, SHR directly targets to the promoter  
74 region of *SCR* (Levesque et al., 2006), and the SCR protein in turn maintains the  
75 nuclear localization of SHR (Cui et al., 2007). SHR and SCR also forms a  
76 heterodimer with each other to regulate a common set of targets for the maintenance  
77 of the QC identity (Cui et al., 2007). In addition, SCR also interacts with the  
78 RETINOBLASTOMA-RELATED (RBR) protein, which plays a role in controlling  
79 the division rate of QC cells (Cruz-Ramirez et al., 2013). More importantly, a recent  
80 study has reported that the Class I teosinte-branched cycloidea PCNA (TCP) proteins

81 combine the above two pathways through interacting with both PLTs and SCR  
82 (Shimotohno et al., 2018), which further reveals their synergistic function for the SCN  
83 specification.

84 Intriguingly, versus the longevity of QC, that of stem cells has been observed to  
85 be hypersensitive to some environmental stresses, such as chilling, UV, and ionizing  
86 radiation (Furukawa et al., 2010; Hong et al., 2017; Johnson et al., 2018). The  
87 SCN-specific programmed cell death (PCD) under these stress conditions is primarily  
88 mediated by the DNA damage response pathway which involves  
89 ATAXIA-TELANGIECTASIA-MUTATED (ATM) and SUPPRESSOR OF GAMMA  
90 RESPONSE 1 (SOG1) (Fulcher and Sablowski, 2009; Hong et al., 2017; Johnson et  
91 al., 2018). ATM is a phosphoinositide-3-kinase-related protein kinase and functions  
92 conservatively in response to DNA double-strand breaks (DSBs) among eukaryotic  
93 species (Garcia et al., 2003; Shiloh, 2006). SOG1 belongs to the plant-specific NAC  
94 [petunia No Apical Meristem (NAM), Arabidopsis Transcription Activation Factor  
95 (ATAF), Cup-Shaped Cotyledon (CUC)] transcription factor family and its function is  
96 analogous to the mammalian p53 (Yoshiyama et al., 2009; Yoshiyama et al., 2013).  
97 The DSBs-triggered signal induces the ATM-dependent hyperphosphorylation of  
98 SOG1 (Yoshiyama et al., 2013), which plays roles in cell cycle arrest, promoting  
99 DNA repair, and programmed death of stem cells under severe cases through  
100 governing the downstream gene transcription (Yoshiyama, 2016). This mechanism is  
101 also involved in maintaining genomic integrity during seed germination (Waterworth  
102 et al., 2016).

103 QC functions in the replenishment of stem cells through division when  
104 programmed death is occurred. Several pathways have been identified to play a role  
105 in controlling the division rate of QC, including the WUSCHEL (WUS)-RELATED  
106 HOMEBOX 5 (WOX5), RBR (mentioned above), and ETHYLENE RESPONSE  
107 FACTOR 115 (ERF115) pathways (Sarkar et al., 2007; Cruz-Ramirez et al., 2013;  
108 Heyman et al., 2013). As a member of the WUS family, WOX5 is highly enriched in  
109 QC and plays a key role in maintaining root columella stem cells (Pi et al., 2015). Its  
110 loss-of-function mutant displays ectopic QC divisions and lack of columella stem

111 cells (Zhang et al., 2015). RBR is the plant homolog of the mammalian RB protein  
112 and exerts a traditional function in inhibition of cell cycle (Wildwater et al., 2005).  
113 Unlike the easily detected and stable expression of *WOX5* and *RBR*, the *ERF115*  
114 expression can be occasionally detected in QC under normal growth conditions  
115 (Heyman et al., 2013). Nevertheless, *ERF115* is highly induced by wound or PCD in  
116 the root SCN and its overexpression leads to extra divisions of QC through the PSK  
117 signaling, which is essential for renewal of the injured cells (Heyman et al., 2016).

118 RAB GTPASE HOMOLOG 8D (Rab8d, also called Rabe1b) is the  
119 nuclear-encoded plastid translation elongation factor EF-Tu in Arabidopsis. Previous  
120 studies have revealed the roles of Rab8d in heat stress response and regulation of leaf  
121 margin development (Li et al., 2018; Liu et al., 2019). In this study, we further found  
122 that Rab8d was required for root development. The *rab8d*-dependent plastid signal  
123 could be transduced by ATM, GENOME UNCOUPLED 1 (GUN1), and ERF115,  
124 which might play roles in controlling the RAM size, the longevity of stem cells, and  
125 the QC activity, respectively. Besides, our results also extended our knowledge on the  
126 role GUN1 in root development, which is known to be involved in the control of  
127 chloroplast biogenesis through mediating plastid-to-nucleus retrograde signaling and  
128 plastid proteostasis (Tadini et al., 2016; Marino et al., 2019; Wu et al., 2019; Zhao et  
129 al., 2019).

130

## 131 RESULTS

### 132 The Reduced function of *Rab8d* affects primary root development

133 According to the gene annotation from The Arabidopsis Information Resource  
134 (TAIR), the gene of *Rabe1b* is renamed *Rab8d* in this study. It has been reported that  
135 an allele of *Rab8d* with a T-DNA insertion in its single exon exhibits a lethal  
136 phenotype (Li et al., 2018; Liu et al., 2019), suggesting that this gene is essential for  
137 plant growth. To further investigate the function of *Rab8d*, we obtained three different  
138 T-DNA insertion lines for this gene. The insertion sites are indicated in Figure 1A.  
139 *rab8d-3* is another allele that contains a T-DNA insertion in the exon. Unsurprisingly,  
140 no homozygous plants of *rab8d-3* were isolated. Nevertheless, in mature-green  
141 siliques, we found that approximately 23.2% seeds were albino (Supplemental Figure  
142 1). Most embryos in these albino seeds were arrested at the globular stage, and many  
143 of them had enlarged suspensors (a typical phenotype accompanied with arrested  
144 embryos, Supplemental Figure 1). In contrast, the embryos in normal seeds (green or  
145 brown) were all developed into the bent-cotyledon stage or beyond (Supplemental  
146 Figure 1). Because the plants developed from the normal seeds were *rab8d-3/+* or  
147 wild type, suggesting that the albino seeds might be homozygous *rab8d-3*. These  
148 observations further confirmed that *Rab8d* is vital for embryo development.

149 The allele of *rab8d-1* (referred as *rabe1b-1* in a previous study) contains a  
150 T-DNA insertion in the gene promoter region (Figure 1A), which leads to an about  
151 three-quarter decrease in the gene transcriptional level (Li et al., 2018). *rab8d-2*  
152 contains a T-DNA insertion in the gene 5' UTR (Figure 1A). Using quantitative PCR  
153 (qPCR), we further confirmed that *rab8d-1* retained about 30% of *Rab8d* mRNA  
154 levels in 5 DAG seedlings, whereas *rab8d-2* retained only about 8% of transcripts,  
155 indicating that both of them were knock-down alleles at least at the seedling stage  
156 (Supplemental Figure 2). The 3 DAG seedlings of both *rab8d-1* and *rab8d-2*  
157 displayed a pale-green phenotype under normal growth conditions (Figure 1B).  
158 Interestingly, the primary root of *rab8d-2* was significantly short than that of wild  
159 type (Figure 1B). The short-root phenotype was clearly mitigated in *rab8d-1* (Figure  
160 1B), suggesting that the root length might be positively correlated with the *Rab8d*

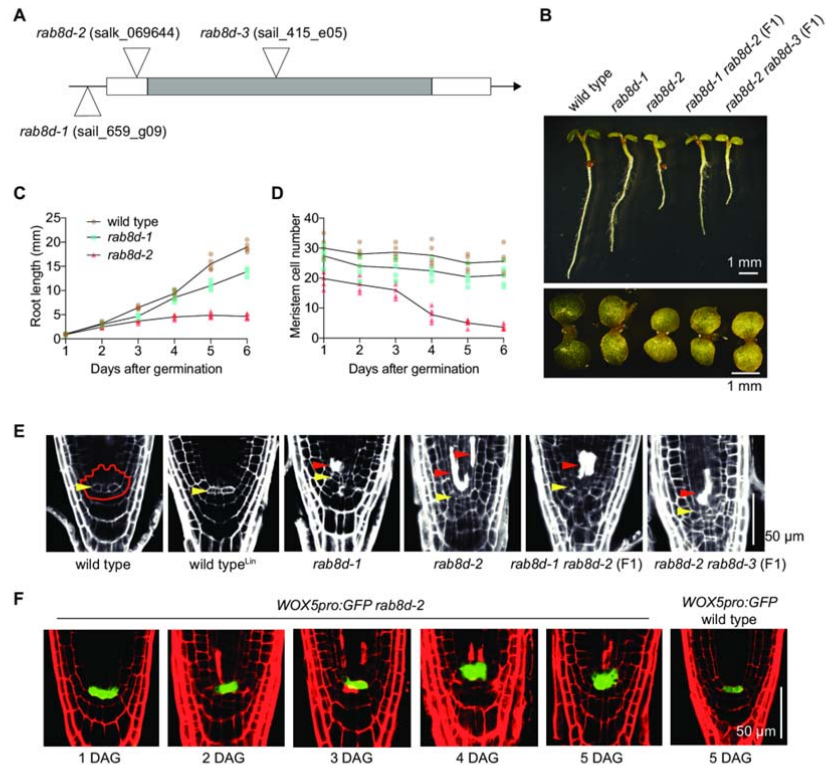

Figure 1. Root developmental phenotypes of the *rab8d* mutants.

(A) Illustration of the *Rab8d* gene structures and positions of T-DNA insertions. The mutant names and corresponding accession numbers are indicated. (B) Phenotypes of 3 DAG seedlings of the indicated lines. (C) Kinematic analyses of primary root growth of the indicated lines from 1 to 6 DAG. (D) Dynamic changes of meristem cell number of the indicated lines from 1 to 6 DAG. (E) Phenotypes of SCN of the indicated lines. Wild type<sup>lin</sup> means treatment with 220 mg/L lincomycin. Roots were stained with PI. The SCN is indicated in wild type with an irregular shape. Yellow arrowheads indicate the QC, and red ones indicate dead cells. (F) Expression patterns of *WOX5pro:GFP* in *rab8d-2* from 1 to 5 DAG. Bars are indicated.

161 expression level. To further confirm this, we obtained two biallelic variants by  
 162 crossing *rab8d-2* with *rab8d-1* and *rab8d-3*, respectively, *rab8d-1/rab8d-2* (F1) and  
 163 *rab8d-2/rab8d-3* (F1). As displayed in Figure 1B, the root of *rab8d-1/rab8d-2* (F1)  
 164 was shorter than *rab8d-1* but longer than *rab8d-2*, and the root of *rab8d-2/rab8d-3*  
 165 (F1) appeared to be equal to *rab8d-2*. Notably, the *rab8d-2* root growth was arrested  
 166 at 4 DAG (Figure 1C) with a rapid drawdown of the meristem cell number (Figure  
 167 1D). These results indicate that Rab8d is required for maintaining root growth. In  
 168 addition, the retarded root growth phenotype of the *rab8d* mutants might not be  
 169 associated with the photosynthesis in shoots because sucrose was applied in the  
 170 growth medium as the carbon source.

171 More interestingly, when we visualize the outlines of root tip cells of 5 DAG

172 seedlings with propidium iodide (PI, a fluorescent dye staining the walls of living  
173 cells), we found that some of the root initials of these *rab8d* mutants were filled with  
174 PI (Figure 1E), indicating the loss of membrane integrity and death of these cells. We  
175 also noticed that the cell death was occurred more frequently in stele initials and their  
176 daughter cells than in columella cells. Furthermore, the QC cells of *rab8d* were  
177 indistinguishable morphologically (Figure 1E), suggesting that these cells became  
178 active and were divided. To further confirm this, we tested the expression of a  
179 QC-specific marker, *WOX5pro:GFP*. Resulting from that *rabe1b-2* contained a low  
180 level of *Rab8d* transcripts and was viable, we employed it as the primary material. At  
181 1 DAG, although no stem cells were taken up by PI and the QC cells could be easily  
182 identified, the GFP signal triggered by the *WOX5* promoter appeared to be slightly  
183 diffused into the stele initials (Figure 1F). At 2~3 DAG, the cell death was seen in  
184 some of the root initials with a similar expansion of the GFP signal (Figure 1F).  
185 Markedly, since 4 DAG, the *WOX5* promoter activity was expanded about two cell  
186 layers and was surrounded by dead cells (Figure 1F), suggesting division of the QC  
187 cells. As a control, in the wild-type background, no expansion of the *WOX5*  
188 expression was observed (Figure 1F). These results suggest that the root stem cells,  
189 especially stele initials, are hypersensitivity to the reduced function of Rab8d, and the  
190 PCD in SCN may further trigger the QC division for the stem cell replenishment.

191 In addition, resulting from that Rab8d is predicted to function in plastid  
192 translation, we wondered if the root growth defect of the *rab8d* mutants was  
193 associated with the impaired plastid translation. To test this, we treated the wild-type  
194 seedlings with a plastid translation inhibitor, lincomycin. The results showed that,  
195 though the root length was slightly reduced by lincomycin (Supplemental Figure 3A),  
196 no cell death was observed in SCN (Figure 1E) and QC was inactive indicated by the  
197 *WOX5* expression (Supplemental Figure 3B), suggesting that the Rab8d-dependent  
198 signal possessed a special role in fine regulating root development.

### 199 **Rab8d is highly accumulated in embryos and RAM**

200 The subcellular localization of Arabidopsis Rab8d has been tested in leaf  
201 epidermal cells of tobacco (*N. benthamiana*) and Arabidopsis protoplast using



202 transient expression by other labs, which results indicate that Rab8d is localized in  
203 chloroplast and formed distinct foci (Lichocka et al., 2018; Liu et al., 2019). We  
204 obtained the stable transgenic lines of *Rab8dpro:Rab8d-GFP* in the *rab8d-2*  
205 background. These transgenic plants were displayed a wild-type phenotype,  
206 suggesting that the fusion protein of Rab8d-GFP was fully functional *in vivo*.  
207 However, inconsistently, under normal growth conditions, we found that Rab8d-GFP  
208 was not formed foci but evenly distributed in chloroplast stroma of mesophyll cells  
209 (Supplemental Figure 4). A previous study has reported that the Rab8d protein is  
210 heat-sensitive because of its rapid aggregation at high temperatures (Li et al., 2018).  
211 We found that when these plants were treated with a heat-stress condition (37°C) for 4  
212 h, agglomerated GFP signals were clearly observed in chloroplasts (Supplemental  
213 Figure 4). Therefore, our result may represent the true localization of Rab8d *in vivo*.

214 Since its vital roles in embryo development, the *Rab8d* expression pattern was  
215 analyzed in embryos of the *Rab8dpro:Rab8d-GFP* line. Indeed, Rab8d could be  
216 clearly detected throughout the embryo development process, even before the  
217 globular stage (Figure 2A). Note that no chlorophyll (Chl) fluorescence was detected  
218 in embryos at pre-globular and globular stages (Figure 2A), indicating that Rab8d was  
219 also present in proplastids. Together with the observation of albino seeds in the  
220 *rab8d-3+/-* siliques (Supplemental Figure 1), these results suggested that Rab8d might  
221 be required for plastid/chloroplast maturation during embryo development. The  
222 pattern of Rab8d protein abundance was further tested in roots, which result showed  
223 that its protein was highly accumulated in the RAM region, including in QC and stem  
224 cells (Figure 2B).

### 225 **The loss of QC identity in *rab8d* correlates with the perturbed auxin maximum** 226 **and PLT and SHR pathways**

227 Auxin is required for the root meristem maintenance (Brumos et al., 2018). The  
228 retarded root growth resulting from the reduced level of Rab8d led us to estimate the  
229 auxin level in root tip. To address this issue, we employed an auxin-responsive marker  
230 *DR5rev:GFP* and tested its activity in root tips of wild type and *rab8d-2* using  
231 confocal. The results showed that, starting from germination, the auxin level

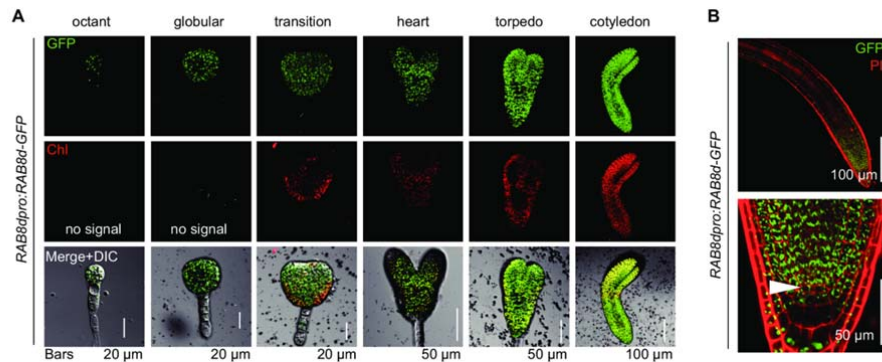

**Figure 2. Expression patterns of *Rab8d* in embryos and roots.**

(A) Expression patterns of *Rab8d* in embryos from the octant stage to the cotyledonary stage. Chl, chlorophyll autofluorescence. (B) The accumulation of *Rab8d* protein in root tips of 3 DAG seedlings. White arrowheads indicate the QC. Bars are indicated.

232 (indicated by the GFP signal) in *rab8d-2* was obviously lower than that in wild type  
233 (Figure 3A). In QC, there is always an auxin maximum that is required for  
234 maintaining the cell identity (Sabatini et al., 1999). However, in *rab8d-2*, the GFP  
235 intensity peak in QC was undetectable (Figure 3B). This result is consistent with the  
236 observation that the QC cells lost their identity and are active in *rab8d-2* (Figure 1E,  
237 F). PINs-mediated polar auxin transport is critical for the establishment of auxin  
238 gradients (Friml et al., 2003; Blilou et al., 2005). Unsurprisingly, the accumulation of  
239 PIN1, PIN2, PIN3, and PIN7 proteins was also significantly reduced in the root of  
240 *rab8d-2* (Supplemental Figure 5). In addition to auxin, transcription factors of PLTs  
241 are also accumulated in gradient in root tip with maxima in QC and stem cells, which  
242 play key roles in the SCN patterning (Galinha et al., 2007). In *rab8d-2*, expression of  
243 *PLT1* and *PLT2* was severely downregulated, and the maximum of *PLT2* was lost,  
244 though that of *PLT1* could be detected weakly in QC (Figure 3C). The SHR-SCR  
245 module is also important for the SCN patterning, paralleling the PLT pathway  
246 (Nakajima et al., 2001; Sabatini et al., 2003). In the wild-type background, the SHR  
247 protein was clearly observed in the stele cells and nuclei of the QC and endodermal  
248 cells. In *rab8d-2*, SHR could be weakly observed in the stele cells, however, no (or

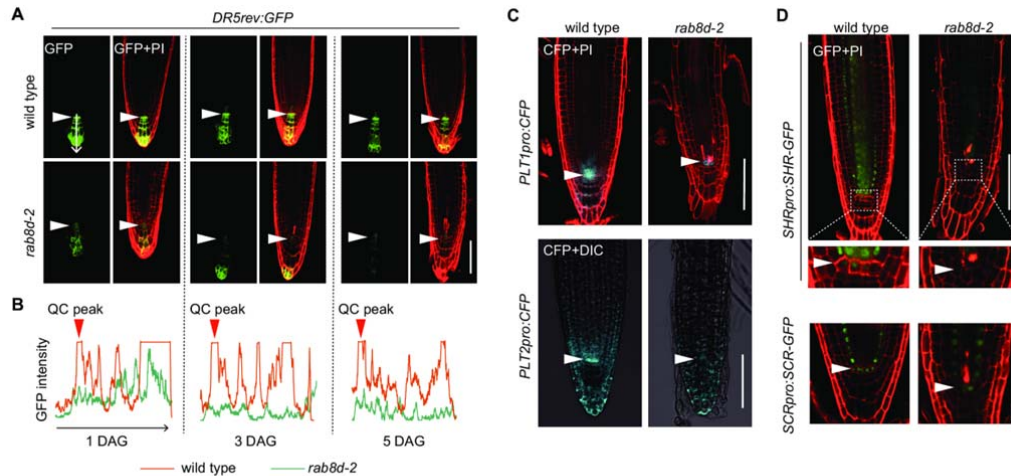

**Figure 3. QC identity is lost in *rab8d-2*.**

(A) Expression of *DR5rev:GFP* in root tips of wild type and *rab8d-2* at 1, 3, and 5 DAG. (B) GFP signal intensity was measured with the software ImageJ according to the arrow indicated in (A). The QC peak indicates the auxin maximum in QC of wild type roots. (C) Expression of *PLT1pro:CFP* and *PLT2pro:CFP* in root tips of 5 DAG seedlings of wild type and *rab8d-2*. (D) Expression of *SHRpro:SHR-GFP* and *SCRpro:SCR-GFP* in root tips of 5 DAG seedlings of wild type and *rab8d-2*. White arrowheads indicate QC. Bars = 50  $\mu$ m.

249 very weak) signal was observed in QC or endodermal cells (Figure 3D). Consistently,  
 250 the accumulation of its downstream factor, SCR, was also significantly decreased  
 251 (Figure 3D). These results suggest that the loss of QC identity is tightly associated  
 252 with the abnormal auxin distribution and the impaired PLT and SHR-SCR signaling  
 253 pathways. The low levels of *PLTs* also positively correlate with the reduced RAM size  
 254 in *rab8d-2*.

255 We further tested the root growth phenotype of *rab8d-2* grown under exogenous  
 256 auxin conditions. The results showed that the exogenous auxin treatment (0.5, 1, and  
 257 2 nM IAA) had no clear effect on the *rab8d-2* root (Supplemental Figure 6A),  
 258 suggesting that the retarded root growth of *rab8d-2* might not be resulted from the  
 259 reduced auxin level *in vivo*. In contrast, the wild type roots were sensitive to the IAA  
 260 treatment reflected by the reduced root length compared with control (Supplemental  
 261 Figure 6A). Brassinosteroids also play roles in regulating root growth (Mussig et al.,  
 262 2003). Note that a very low level of exogenous brassinolide (BL, 0.01 nM)  
 263 application significantly promoted root growth of wild type (Supplemental Figure 6B).  
 264 By contrast, the root growth of *rab8d-2* was further inhibited under the same  
 265 condition (Supplemental Figure 6B), suggesting that *rab8d-2* was more sensitive to

266 exogenous BL than wild type. Under higher concentrations of BL (0.05 and 0.1 nM),  
267 both wild type and *rab8d-2* displayed a decreased root length phenotype  
268 (Supplemental Figure 6B). Together, the retarded root growth of *rab8d-2* is likely  
269 independent of auxin or BR signaling.

#### 270 **Root transcriptome comparison between wild type and *rab8d-2***

271 To further figure out the molecular mechanism of the regulation of root growth  
272 by Rab8d, we performed transcriptome profiling using RNA-sequencing (RNA-seq)  
273 to find out changes in global gene expression between wild type and *rab8d-2*. Total  
274 RNA was extracted from roots of 5 DAG seedlings, and a total of 24233 genes were  
275 detected (Supplemental Dataset 1). Consistent with the observation of increased  
276 *WOX5* promoter activity in *rab8d-2*, its transcript abundance was elevated about 3.5  
277 folds (Supplemental Figure 7). The mRNA levels of *SHR*, *SCR*, *PLT1*, *PLT2* and  
278 *PIN2* were all decreased to some extent (Supplemental Figure 7). However, the  
279 transcript abundance of *PIN1* and *PIN7* was not clearly affected, and that of *PIN3*  
280 appeared to be slightly increased (Supplemental Figure 7), suggesting a potential  
281 posttranscriptional response of these genes to the defect of Rab8d. Compared to wild  
282 type, *rab8d-2* possessed 2587 up- and 2149 downregulated genes based on the fold  
283 change  $> 2$  and adjusted *P* value  $< 0.001$  (Supplemental Dataset 2). Through  
284 analyzing the Gene Ontology (GO) enrichment in terms of biological processes, we  
285 found that approximately 72 upregulated genes were associated with photosynthesis  
286 (Supplemental Dataset 3), suggesting that this process was sensitive to the reduced  
287 function of Rab8d, even in the non-photosynthetic tissue, the root. More interestingly,  
288 approximately a quarter of upregulated genes were associated with response to  
289 stimulus, including abiotic and biotic stresses and hormones (Supplemental Dataset 3).  
290 The result suggests that the reduced function of Rab8d mimics these stress conditions  
291 and affects homeostasis of their responsive gene transcripts. By contrast, the  
292 downregulated genes were primarily associated with signaling pathways including the  
293 PCD, protein modification, cell growth and cycle regulation, and root development  
294 (Supplemental Dataset 4).

295 **The reduced root meristem size in *rab8d* is partially rescued by perturbing the**

296 **ATM pathway**

297       Among the mis-regulated genes in *rab8d-2*, the dramatically increased transcript  
298 abundance of the gene encoding one of the cyclin-dependent kinase inhibitors,  
299 *SIAMSE-RELATED5* (*SMR5*, Figure 4A), attracted our attention because of its role in  
300 cell cycle inhibition (Yi et al., 2014). To further confirm this result, we compared the  
301 *SMR5pro:GUS* activity between wild type and *rab8d-2*. In the wild-type background,  
302 *SMR5pro:GUS* was predominantly expressed in the columella cells with a very low  
303 level in the meristem region (Figure 4B). However, in the *rab8d-2* background, the  
304 expression of *SMR5pro:GUS* was markedly observed in the meristem region (Figure  
305 4B). We thus assumed that the cell cycle might be affected in the root meristem of  
306 *rab8d-2*. To test this hypothesis, we first compared the density of cells entered the S  
307 phase [detected with the thymidine analogue 5-ethynyl-2'-deoxyuridine (EdU)]  
308 between wild type and *rab8d-2* (see details in Methods). The results showed that the  
309 density of cells entered the S phase was reduced by roughly half in *rab8d-2*  
310 (Supplemental Figure 8A, B). Then we employed the *CycB1;1pro:GUS* reporter to  
311 indicate cells at the G2/M transition phase. Using GUS staining, we found that the  
312 density of GUS-positive cells was significantly increased in *rab8d-2* (Supplemental  
313 Figure 8C, D). On account of the affected S-phase entry, the increased G2/M cell  
314 density in *rab8d-2* suggested the lack of M-phase entry because of degradation of the  
315 fused protein of GUS with a mitotic destruction box at M phase. These observations  
316 suggest that Rab8d is important for the global cell cycle maintenance, and the reduced  
317 meristem size of *rab8d-2* may be resulted from the affected cell cycle. To further  
318 investigate whether the reduced meristem size of *rab8d-2* was associated with the  
319 induction of *SMR5*, we eradicated the *SMR5* function in *rab8d-2* by crossing it with a  
320 knockout allele of *smr5*. Our observations indicated that the loss of *SMR5* function  
321 indeed rescued, but not fully, the root growth phenotypes of *rab8d-2*, including the  
322 root length and the number of meristem cells (Figure 4C-E).

323       We also noted that the expression pattern of *SMR5* in the *rab8d-2* root is very  
324 similar as observed in the root treated with the DNA replication inhibitory drug  
325 hydroxyurea (Yi et al., 2014). The induction of *SMR5* on the genotoxic stress

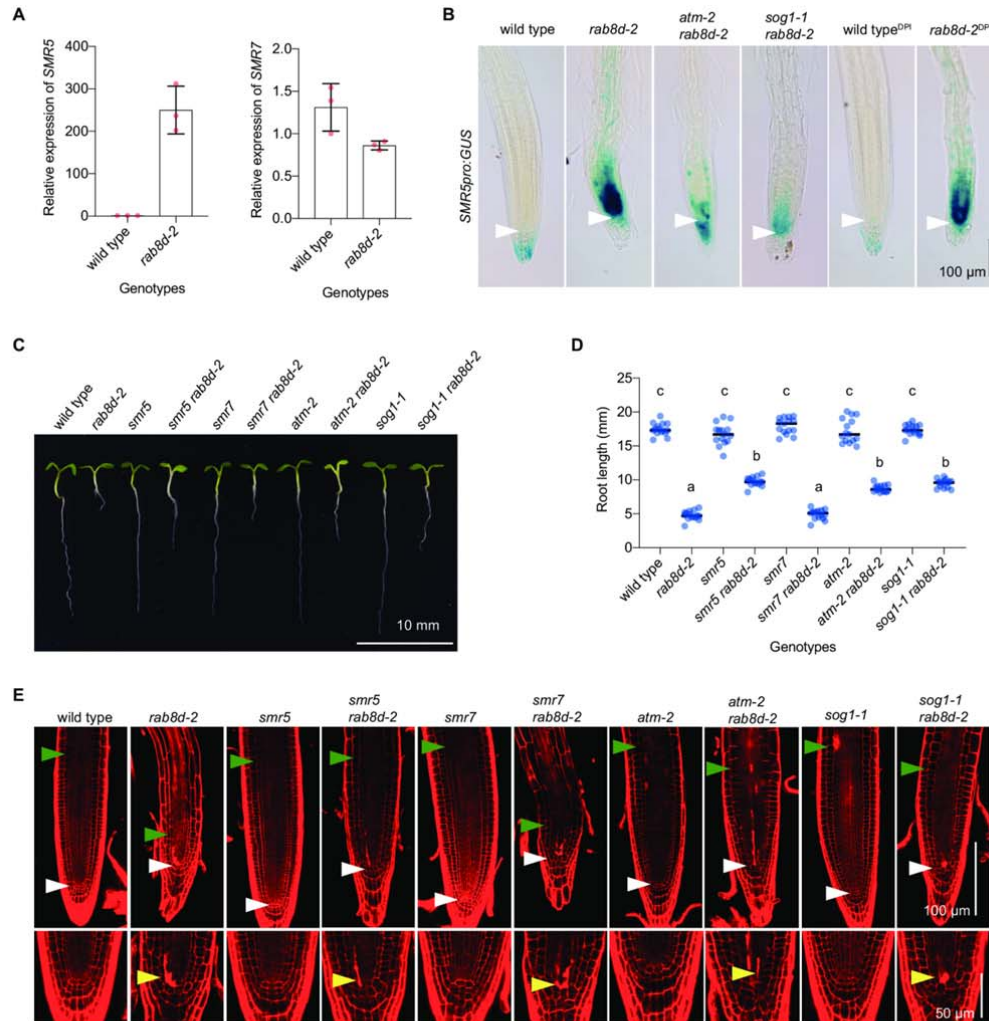

**Figure 4. The function loss of *smr5* rescues the meristem phenotype of *rab8d-2*.**

(A) Comparison of expression level of *SMR5* and *SMR7* between wild type (set to 1) and *rab8d-2*. The data was based on the FPKM values tested by RNA-seq. (B) The expression of *SMR5pro:GUS* in root tip of 5 DAG seedlings of wild type, *rab8d-2*, *atm-2 rab8d-2*, *sog1-1 rab8d-2*, and DPI-treated wild type (wild type<sup>DPI</sup>) and *rab8d-2* (*rab8d-2*<sup>DPI</sup>). White arrowheads indicate QC. (C) Phenotypes of 5 DAG seedlings of the indicated genotypes. (D) Comparison of root length among the indicated genotypes. Each spot represents an individual value, and black dashes indicate mean values. Significance analysis was performed using one-way ANOVA, and different lowercases indicate  $P < 0.0001$ . (E) Root tip phenotypes of 5 DAG seedlings of the indicated genotypes. White arrowheads indicate QC, green ones indicate the basal cell of the elongation region, and yellow ones indicate dead stem cells. The distance between white and green arrowheads indicate the meristem size.

326 conditions is dependent on ATM and SOG1 (Yi et al., 2014). As a consequence, we  
 327 wondered whether the induction of *SMR5* in the *rab8d-2* root was also mediated by  
 328 the ATM pathway. To address this issue, we introduced the *SMR5pro:GUS* reporter  
 329 into the double mutant backgrounds of *atm-2 rab8d-2* and *sog1-1 rab8d-2*. Using  
 330 GUS staining, we found that the loss of ATM or SOG1 function dramatically reduced  
 331 the activity of *SMR5pro:GUS* in the RAM of *rab8d-2* (Figure 4B). The observation

332 suggested that the ATM-SOG1 pathway could perceive the *rab8d*-dependent signal. In  
333 addition, the *SMR5* expression also can be highly induced by ROS, which is mediated  
334 by the ATM pathway as well (Yi et al., 2014). We further wondered whether the  
335 *SMR5* induction in response to the reduced function of *Rab8d* was associated with  
336 ROS. Using 3,3-diaminobenzidine (DAB) staining, we observed no significant  
337 change in the H<sub>2</sub>O<sub>2</sub> level in *rab8d-2* relative to that in wild type (Supplemental Figure  
338 9A). Yet, using nitroblue tetrazolium (NBT) staining, we found that the superoxide  
339 accumulation was higher in the root of *rab8d-2* than in that of wild type, especially in  
340 the stele of elongation zone (Supplemental Figure 9B). To investigate the role of  
341 superoxide in the regulation of *SMR5* in *rab8d-2*, we treated seedlings with an  
342 NADPH oxidase inhibitor, diphenylene iodonium (DPI). However, in *rab8d-2*, no  
343 obvious difference in the *SMR5pro::GUS* activity was observed between seedlings  
344 grown under control and DPI (Figure 4B), which indicated that the induction of *SMR5*  
345 expression was not associated with the ROS signaling. Consistently, DPI had no clear  
346 effect on the root growth phenotype of the *rab8d* mutants, whereas it slightly reduced  
347 the root length of wild type (Supplemental Figure 9C).

348 As *smr5* partially rescued the root phenotypes of *rab8d-2*, we further examined  
349 the effect of loss of ATM or SOG1 function on them. Compared with *rab8d-2*, both  
350 the double mutants of *atm-2 rab8d-2* and *sog1-1 rab8d-2* possessed significantly  
351 longer roots and more root meristem cells (Figure 4C-E), although these rescues were  
352 partial likewise. More importantly, the ATM-SOG1 pathway mediates the DNA  
353 damage induced PCD in SCN (Fulcher and Sablowski, 2009; Yoshiyama et al., 2013).  
354 However, the loss of ATM, SOG1 or *SMR5* had no effect on the PCD phenotype in  
355 SCN of *rab8d-2* (Figure 4E).

356 In addition, consistent with *SMR5*, *SMR7* is also in response to the ATM and  
357 SOG1 mediated ROS signaling and plays a role in regulating cell cycle (Yi et al.,  
358 2014). However, based on the RNA-seq results, the abundance of *SMR7* transcripts  
359 was slightly reduced in the *rab8d-2* root (Figure 4A). Therefore, it is not surprised  
360 that the loss of *SMR7* function had no effect on root development of *rab8d-2* (Figure  
361 4C-E).

362 Together, the above results indicate that the ATM-SOG1 module perceives the  
363 *rab8d*-dependent signal and plays a role in regulation of RAM size in *rab8d-2*  
364 through inducing the *SMR5* expression.

### 365 **The loss of QC identity in *rab8d-2* is dependent on ERF115**

366 The strong reaction of *ERF115* to the reduced expression of Rab8d (Figure 5A)  
367 also attracted our attention because of its roles in regulating the QC activity and stem  
368 cell renewal (Heyman et al., 2013; Heyman et al., 2016). Through detecting the GFP  
369 signals triggered by *ERF115pro:NLS-GFP* in the *rab8d-2* background, we found that  
370 the *ERF115* expression was highly induced in the meristematic stele cells surrounding  
371 the dead ones from 3 DAG, whereas no (or extremely weak) signals were observed in  
372 the wild-type background (Figure 5B). The hyperactive of *ERF115* expression might  
373 be associated with the death of stele initials because of its wounding-responsive  
374 characteristic (Heyman et al., 2016). Nevertheless, at 1.5 DAG, no cell death was  
375 observed but the *ERF115* expression could be clearly detected in SCN of *rab8d-2*  
376 (Figure 5B), suggesting onset of programmed death of some of these cells.

377 It has been reported that the expression of *ERF115* leads to division of the QC  
378 cells (Heyman et al., 2013). Our results also clearly indicated the high expression of  
379 *ERF115* in the QC and QC-like cells of *rab8d-2* (Figure 5B). We thus wondered that  
380 whether the loss of QC identity in the *rab8d-2* root was associated with the induction  
381 of *ERF115*. To address this issue, we crossed *rab8d-2* with a dominant-negative  
382 mutant *ERF115<sup>SRDX</sup>*. The results showed that, interestingly, the loss of *ERF115*  
383 function further inhibited the root growth of *rab8d-2* (Figure 5C, D). In consistent  
384 with this result, the meristem cell number of *rab8d-2 ERF115<sup>SRDX</sup>* was significantly  
385 less than that of *rab8d-2* (Figure 5E). More importantly, although the PCD phenotype  
386 was observed in SCN, the QC cells appeared to be inactive and were easily identified  
387 in *rab8d-2 ERF115<sup>SRDX</sup>* (Figure 5F). In contrast, although the SCN was normal in the  
388 overexpression line of *ERF115* (*ERF115-OE*), its QC was indistinguishable because  
389 of cell division (Figure 5F). These observations suggest that ERF115 has no roles in  
390 controlling the longevity of SCN but functions in the activation of QC cells in  
391 *rab8d-2*.



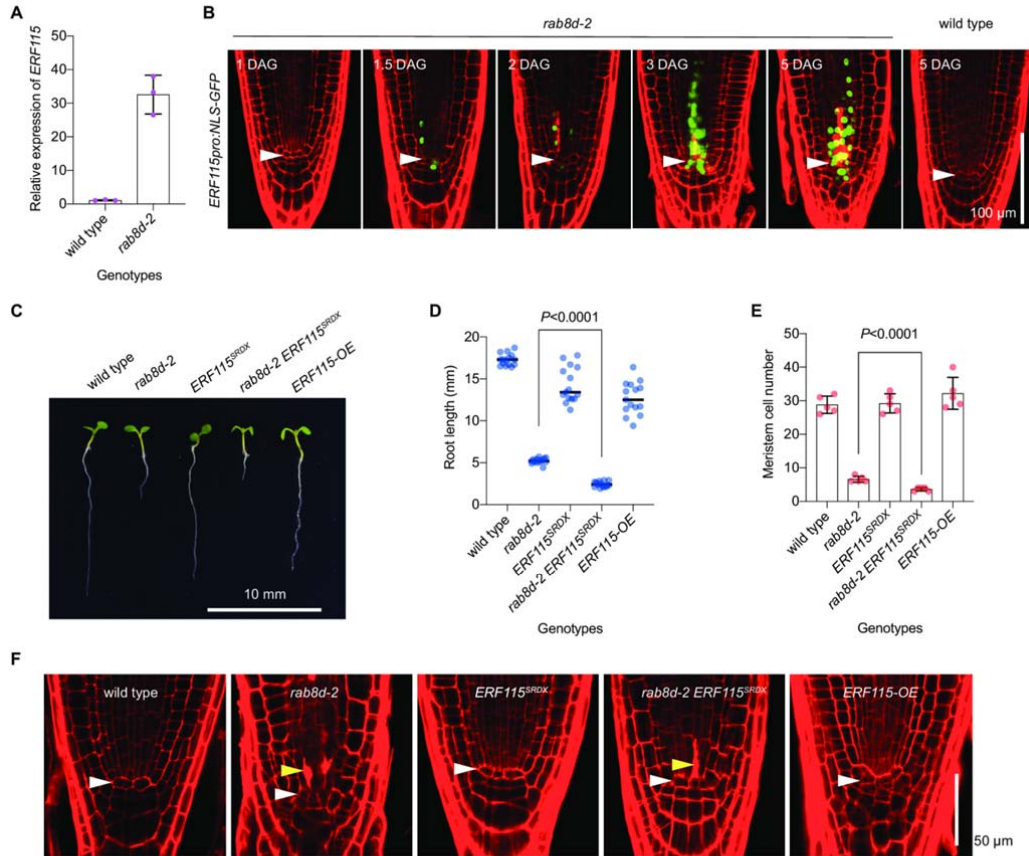

**Figure 5. The function loss of ERF115 inhibits the QC division in *rab8d-2*.**

(A) Comparison of expression level of *ERF115* between wild type (set to 1) and *rab8d-2*. The data was based on the FPKM values tested by RNA-seq. (B) The expression of *ERF115pro::NLS-GFP* in root tip of *rab8d-2* (from 1 to 5 DAG) and wild type (5 DAG). White arrowheads indicate QC. (C) Phenotypes of 5 DAG seedlings of the indicated genotypes. (D, E) Comparison of root length (D) and meristem cell number (E) among the indicated genotypes. Each spot represents an individual value. For (D), black dashes indicate mean values. For (E), data indicate mean  $\pm$  SD. Significance analysis was performed using *t* test. (F) SCN phenotypes of 5 DAG seedlings of the indicated genotypes. White arrowheads indicate QC, and yellow ones indicate dead stem cells.

### 392 Rab8d physically interacts with GUN1 *in vivo*

393 To further dig out the molecular mechanism of *rab8d*-dependent programmed  
 394 death of stem cells, we performed a GFP-tag based co-immunoprecipitation (co-IP)  
 395 experiment for isolating potential interaction partners of Rab8d from a homozygous  
 396 line of *Rab8dpro::Rab8d-GFP*. After peptide identification by mass spectrometry  
 397 (MS), a total of 344 proteins were identified (Figure 6A, Supplemental Dataset 5). As  
 398 expected, most of these proteins were localized in plastids according to the  
 399 information from TAIR. In terms of the Eukaryotic Orthologous Groups (KOG)  
 400 classification, 83 proteins were involved in translation, ribosomal structure and

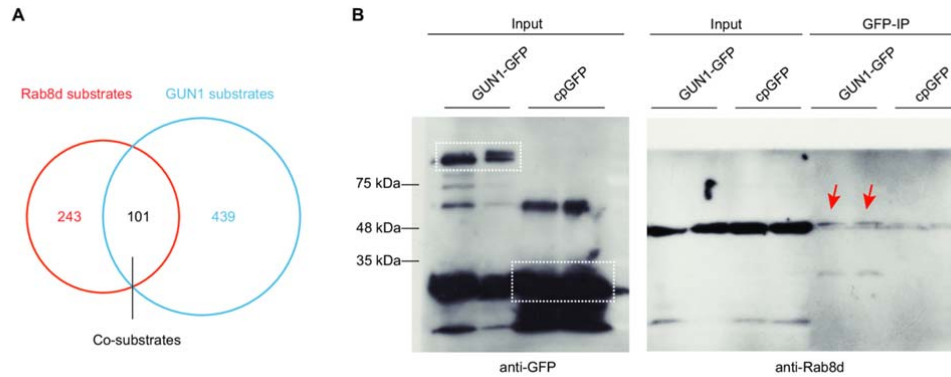

**Figure 6. Rab8d physically interacts with GUN1 *in vivo*.**

(A) Venn diagram indicates the common substrates (co-substrates) between Rab8d and GUN1. The Rab8d substrates were isolated from the *Rab8dpro:Rab8d-GFP* transgenic plants in the *rab8d-2* background. The published data for the GUN1 substrates were employed. (B) Co-IP analysis indicates the interaction between GUN1 and Rab8d *in vivo*. Dotted boxes indicate the bands of prey proteins. Red arrows indicate the bands of Rab8d.

401 biogenesis, and 55 proteins were involved in posttranslational modification, protein  
402 turnover and chaperones (Supplemental Dataset 6), suggesting that Rab8d played a  
403 role in maintaining plastid proteostasis. This observation reminded us that another  
404 protein, GUN1, also regulates plastid proteostasis through the transient formation of  
405 various protein complex with different substrates (Tadini et al., 2016; Marino et al.,  
406 2019; Wu et al., 2019). We thus wondered that whether Rab8d and GUN1 shared  
407 common partners. Through comparing the proteomic data of GUN1-GFP substrates at  
408 the seedling stage from a recent study (Wu et al., 2019) with our data of Rab8d-GFP  
409 ones, remarkably, more than one quarter of the identified Rab8d partners (a total of  
410 101) were associated with GUN1 (Figure 6A, Supplemental Dataset 7).

411 Like Rab8d, the GUN1 protein shows a diffuse distribution pattern in plastids  
412 (Wu et al., 2018). The above results implied an association between Rab8d and GUN1  
413 *in vivo*. We did not detect any GUN1 peptides in the Rab8d substrates, which might  
414 be resulted from the extremely low protein abundance of GUN1 *in vivo* (Wu et al.,  
415 2018). However, based on the published proteomic data (Tadini et al., 2016; Wu et al.,  
416 2019), Rab8d presents in the GUN1-dependent substrates. To further confirm the  
417 interaction between Rab8d and GUN1, we employed an overexpression line of  
418 GUN1-GFP (OE-13) and conducted the GFP-based IP. The result showed that Rab8d  
419 could be detected in the direct substrates of GUN1 (Figure 6B). In contrast, the Rab8d

420 level in the cpGFP (a plastid targeted GFP fused with the RbcS transit peptide)  
421 substrates was extremely weak (Figure 6B). The results suggest that Rab8d can  
422 directly target GUN1 *in vivo*.

### 423 **GUN1 determines the longevity of SCN in *rab8d***

424 Since Rab8d physically interacted with GUN1, we wondered the effect of loss of  
425 GUN1 function on the *rab8d* phenotype. To address this issue, we tried to eradicate  
426 the GUN1 function in *rab8d-2* by crossing it with *gun1-101* (a widely used T-DNA  
427 insertion mutant of *GUN1*). However, no viable homozygous double mutant of  
428 *gun1-101 rab8d-2* was isolated. Nevertheless, we found that a small portion of  
429 seedlings of the F2 population was etiolated or albino with severely arrested root  
430 growth (Figure 7A). These plants could not develop true leaves, suggesting a  
431 cotyledon-lethal phenotype (Figure 7A). We further confirmed that these plants were  
432 homozygous *gun1-101 rab8d-2* using PCR detection. Notably, the root architecture of  
433 double mutant was severely disorganized, the SCN was hardly identified, and many  
434 of the root tip cells were enlarged (Figure 7B). The cellular enlargement might be  
435 associated with differentiation and endoreduplication. To further confirm this  
436 observation, we introduced *gun1-8* (a site-mutation allele of *gun1*) into *rab8d-2*, and a  
437 similar phenotype was observed in the *gun1-8 rab8d-2* double mutant (Figure 7B).  
438 These results suggest that GUN1 likely is vital for maintaining the root architecture of  
439 *rab8d-2*.

440 We assumed that the severe developmental defect of *gun1 rab8d-2* might be  
441 partially associated with the very low level (about 8%) of *Rab8d* transcripts in  
442 *rab8d-2*. To test this, we crossed *gun1-101* with the *rab8d-1* allele that retained about  
443 30% of *Rab8d* transcripts as mentioned above and analyzed the double mutant  
444 phenotypes. The results showed that, indeed, the *gun1-101 rab8d-1* double mutant  
445 displayed a mitigated phenotype relative to *gun1-101 rab8d-2* because it could  
446 develop true leaves (Figure 7C). Nevertheless, the *gun1-101 rab8d-1* plants were still  
447 pale-green or albino and arrested before the reproductive stage (Figure 7C). In  
448 addition, the root of *gun1-101 rab8d-1* was significantly shorter than the single  
449 mutants (Figure 7D), suggesting that *rab8d-1* was hypersensitive to *gun1-101*, and

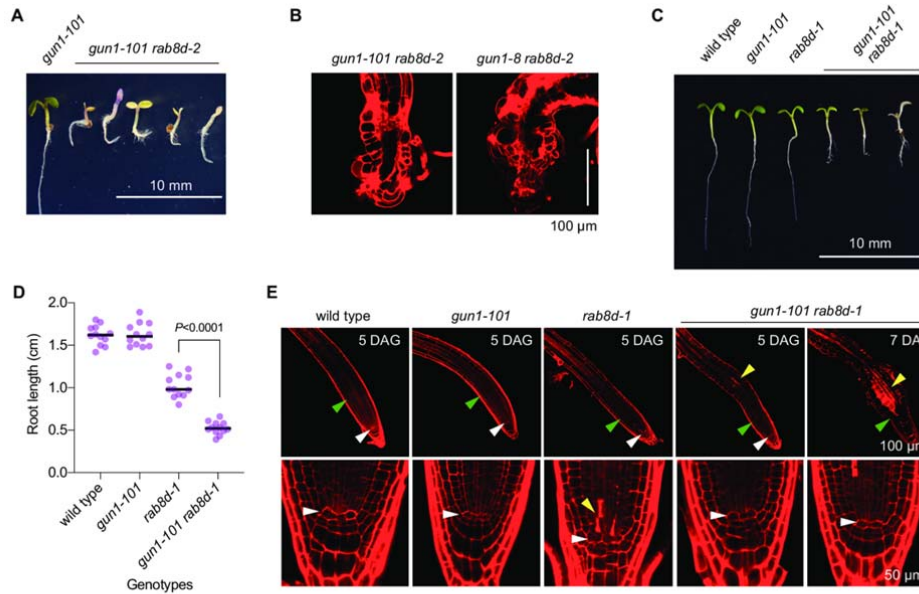

**Figure 7. The function loss of GUN1 inhibits PCD in root stem cells of *rab8d-1*.**

(A) Phenotypes of the *gun1-101 rab8d-2* double mutant at 5 DAG. (B) Phenotypes of root tips of the *gun1-101 rab8d-2* and *gun1-8 rab8d-2* double mutants at 5 DAG. (C) Seedling phenotypes of the indicated genotypes at 5 DAG. (D) Comparison of root length among the indicated genotypes. Each spot represents an individual value, and black dashes indicate mean values. Significance analysis was performed using *t* test. (E) Phenotypes of root tips of the indicated genotypes at the indicated stages. White arrowheads indicate QC, green ones indicate the basal cell of elongation region, and yellow ones indicate dead cells. Note that, at 7 DAG, a large area of cells was dead in the transition/elongation zone.

450 vice versa. Using PI staining, we found that the loss of *GUN1* function had no clear  
 451 effect on the root tip architecture, whereas *rab8d-1* displayed phenotypes including  
 452 the reduced root meristem size, PCD of stele initials, and disorganized QC (Figure  
 453 7E). By contrast, at 5 DAG, although the *gun1-101 rab8d-1* double mutant showed a  
 454 reduced root meristem size phenotype as well, no cell death was observed in the root  
 455 stele initials, and the QC organization was normal (Figure 7E). These observations  
 456 suggest that the loss of GUN1 function rescued the abnormal SCN phenotype but had  
 457 no effect on the meristematic zone of *rab8d-1* at this stage. However, unexpectedly, in  
 458 the root transition zone of *gun1-101 rab8d-1*, some of the stele cells were filled with  
 459 PI (indicated by a yellow arrowhead in Figure 7E), suggesting PCD of these cells. At  
 460 7 DAG, there was still no cell death in the SCN of *gun1-101 rab8d-1*, but, noticeably,  
 461 its transition zone was enlarged with death of a large area of cells (Figure 7E). At  
 462 about 12 DAG, the root architecture of *gun1-101 rab8d-1* was severely impaired, like  
 463 *gun1-101 rab8d-2* (Supplemental Figure 10). These results suggest that GUN1 likely

464 is required for the death and renewal of root stem cells in the *rab8d* mutants, which  
465 might be important for maintaining the root architecture. The observations on *gun1*  
466 *rab8d-2* also could be explained by this hypothesis.

467 GUN1 has been well-studied because it is the hub integrating multiple  
468 plastid-to-nucleus retrograde signaling pathways (Pesaresi and Kim, 2019; Zhao et al.,  
469 2019). Since the mis-regulated expression of a number of nuclear genes by the  
470 reduced function of Rab8d, we assumed that the GUN1-dependent plastid signals  
471 might be involved in the PCD of root stem cells in the *rab8d* mutants. A recent study  
472 has reported that blocking the cytosolic HSP90 function with its specific inhibitor  
473 geldanamycin (GDA) significantly mitigated the GUN phenotype of *gun1* (Wu et al.,  
474 2019). According to this result, we further tested the phenotypes of *gun1-101 rab8d-1*  
475 and *gun1-101 rab8d-2* grown under 50  $\mu$ M and 100  $\mu$ M GDA conditions. The results  
476 showed that the GDA treatment had no effect on phenotypes of these two lines  
477 (Supplemental Figure 11), suggesting that the *rab8d*-dependent signaling was  
478 HSP90-independent.

479 Another recent study reported that GUN1 exerts its role in communication  
480 between plastids and nuclei through controlling the tetrapyrrole metabolism (Shimizu  
481 et al., 2019). To test whether the tetrapyrrole-related signals were responsible for the  
482 PCD of root initials in *rab8d*, we crossed another *gun* mutant, *conditional chlorina*  
483 (*cchl1-1*, a *gun5* allele), with *rab8d-2*. *GUN5* encodes the H-subunit of Mg-chelatase,  
484 which participates in the tetrapyrrole biosynthesis pathway (Adhikari et al., 2011).  
485 Unlike *gun1-101 rab8d-2*, the *cchl1-1 rab8d-2* double mutant was viable  
486 (Supplemental Figure 12). The shoot of *cchl1-1* displayed a paler phenotype compared  
487 with *rab8d-2*, but its root length was similar to wild type (Supplemental Figure 12A,  
488 B). By contrast, the *cchl1-1 rab8d-2* double mutant displayed a *cchl*-like shoot and a  
489 *rab8d*-like root length (Supplemental Figure 12A, B). Importantly, the root tip  
490 architecture of *cchl1-1 rab8d-2* was also similar to the *rab8d-2* single mutant  
491 (Supplemental Figure 12C), which indicated that *rab8d-2* was not sensitive to the loss  
492 of GUN5 function. These observations further suggest that the tetrapyrrole-mediated  
493 retrograde signaling might not be associated with the PCD phenotype in the root SCN

494 of *rab8d*.

495

496 **DISCUSSION**

497 Plastids, as a kind of semiautonomous organelles in plant cells, are indispensable  
498 for normal plant growth and development. Many studies have implied that signals  
499 triggered by impaired plastid translation regulate both shoot and root development.  
500 For instance, the perturbed function of SCABRA1 (SCA1), a plastid-targeted  
501 ribosomal protein, enhances the leaf polarity defects of *asymmetric leaves* (*as1* and  
502 *as2*) mutants (Mateo-Bonmati et al., 2015). Several members of SUPPRESSOR OF  
503 VARIATIONs (SVRs) have been found to play a role in the leaf margin  
504 development (Zheng et al., 2016; Liu et al., 2019). REGULATOR OF FATTY ACID  
505 COMPOSITION3 (RFC3), also a plastid ribosomal protein, is required for the stem  
506 cell patterning in lateral roots (Nakata et al., 2018). In this study, we discovered an  
507 unexpected role for the plastid EF-Tu Rab8d in maintaining the primary root growth  
508 and development. Nevertheless, robust inhibition of plastid translation by an  
509 exogenous drug lincomycin could not accurately mimic the phenotypes of *rab8d-2*  
510 (Supplemental Figure 3). These results suggest that the plastid translation-dependent  
511 signaling is sophisticated and multifunctional and may require an accurate signal for  
512 regulating root development.

513 A previous study reported that auxin homeostasis is sensitive to repression of  
514 plastid translation in leaves (Zheng et al., 2016). *SVR9* encodes a plastid translation  
515 initiation factor, and its function loss leads to disturbed auxin distribution in leaves,  
516 which is linked with the abnormal leaf margin development of the *svr9* mutant (Zheng  
517 et al., 2016). Rab8d has been identified as an SVR member, SVR11, because its  
518 mutation can suppress the variegation phenotype of *yellow variegated* (*var2*), like  
519 other SVRs (Liu et al., 2019). *svr11* enhances the abnormal leaf margin phenotype of  
520 *svr9* (Liu et al., 2019). *scal* also displays a similar phenotype (Mateo-Bonmati et al.,  
521 2015). Furthermore, exogenous application of plastid translation inhibitors displays a  
522 similar effect on auxin distribution as in the *svr9* mutant (Zheng et al., 2016). These  
523 observations suggest an unknown mechanism that plastid translation dependent  
524 signals regulate auxin homeostasis in leaves. Our results indicated that the auxin  
525 homeostasis was affected in the root tip of *rab8d-2* (Figure 3A), which was tightly

526 associated with the disturbed accumulation of PINs (Supplemental Figure 5). Whether  
527 the regulation of auxin homeostasis in roots by *rab8d-2* shares a common mechanism  
528 with that in leaves by plastid translation dependent signals needs to be further  
529 investigated.

530 The most interesting phenotype in roots of the *rab8d* mutants is the PCD of stem  
531 cells (Figure 1E). This phenotype is frequently observed when DNA is damaged. In  
532 both plants and animals, two highly conserved protein kinases ATM and  
533 ATM/RAD3-RELATED (ATR) mediate the DNA damage response (DDR), including  
534 inhibition of cell cycle progression, promoting DNA repair, PCD, and early  
535 endoreduplication (Shiloh, 2006; Cimprich and Cortez, 2008; Hu et al., 2016). In  
536 animals, DDR efficiently prevents cancer and protects the germline (Rich et al., 2000).  
537 In plants, DDR is also important for the plant viability (Johnson et al., 2018).  
538 Mutation in *ATM* or its downstream transcription factor *SOG1* leads to permanent  
539 arrest of root growth when plants were suffered severe DNA damage (Garcia et al.,  
540 2003; Johnson et al., 2018). Our observations suggest that ATM and SOG1 mediate  
541 the inhibition of cell cycle progression in root meristem of *rab8d-2* through inducing  
542 the *SMR5* expression, yet, the PCD phenotype in the *rab8d-2* SCN is independent of  
543 ATM or SOG1 (Figure 4). We can imagine that if ATM and SOG1 function in PCD in  
544 the *rab8d-2* SCN, the double mutants of *atm-2 rab8d-2* and *sog1-1 rab8d-2* should be  
545 lethal, like *atm-2* and *sog1-1* under DNA-damaged conditions. Thus, the viability of  
546 *atm-2 rab8d-2* and *sog1-1 rab8d-2* is, to some extent, consistent with the  
547 independence of the ATM-SOG1 module in the PCD phenotype in the root SCN of  
548 *rab8d-2*. These results suggest that the *rab8d*-dependent signaling and the DDR  
549 signaling pathways are partially merged. Nevertheless, how ATM perceive the  
550 *rab8d*-dependent signal remains elusive. In animal cells, a fraction of ATM targets to  
551 mitochondria and exerts its function in modulating mitochondrial homeostasis  
552 (Maryanovich et al., 2012; Valentin-Vega et al., 2012). However, the exact subcellular  
553 localization of the plant ATM is still mystery until now. A recent study has suggested  
554 the mitochondrial localization of Arabidopsis ATM through expressing its N-terminal  
555 region fused with GFP (Su et al., 2017), but this observation does not represent the



556 true localization of the full protein. Notably, the MS results of two previous studies  
557 from different labs showed that ATM, at least a portion of proteins, targets to the  
558 plastid stroma (Kleffmann et al., 2004; Peltier et al., 2004). Thus, the merge of  
559 localization between ATM and Rab8d further supports our hypothesis that ATM can  
560 perceive the *rab8d*-dependent plastid signal. Yet, the perception might be indirect  
561 because ATM is absent from the Rab8d substrates.

562 The PCD in SCN might be an inducement for the QC division in *rab8d* mutants,  
563 because the latter was lagged the former (Figure 1E, F). The expression level of  
564 *ERF115* in *rab8d-2* was positively associated with the damage degree of SCN (Figure  
565 5B), which was in agreement with the role of ERF115 in full SCN recovery (Heyman  
566 et al., 2016). Consistent with the induction of *ERF115*, the transcriptional level of a  
567 target gene of ERF115, *PSK5*, was also increased significantly in *rab8d-2* (based on  
568 the RNA-seq data presented in Supplemental Dataset 1). We further revealed that  
569 ERF115 was responsible for the QC division in *rab8d-2* (Figure 5F). Because the  
570 replenishment of stem cells requires QC division, the loss of ERF115 function might  
571 reduce the renewal ratio of stem cells in *rab8d-2*. This hypothesis can explain the  
572 much shorter root of *ERF115<sup>SRDX</sup> rab8d-2* than that of *rab8d-2* (Figure 5C).

573 The physical interaction between GUN1 and Rab8d suggests that GUN1 can  
574 directly monitor the Rab8d homeostasis. It is unexpected that the loss of GUN1  
575 function rescues the PCD phenotype in the *rab8d-1* SCN (Figure 7E) because no  
576 studies reveal the role of GUN1 in root development until now. The severely impaired  
577 root architecture in *rab8d gun1* double mutants (Figure 7B, E) suggests that the  
578 programmed death and renewal of stem cells in *rab8d* mutants is required for  
579 maintaining root development. GUN1 is a pentatricopeptide repeat (PPR) protein with  
580 a high turnover rate and only can be detected, but still weakly, at the first days after  
581 germination (Wu et al., 2018). Under normal growth conditions, the *gun1* mutant  
582 displays a slightly delayed plastid differentiation phenotype (Wu et al., 2018). When  
583 plastid biogenesis is affected, however, the coordination of gene expression between  
584 plastid and nucleus is impaired in *gun1* (Susek et al., 1993). Recent studies have  
585 provided two different hypotheses on the mechanism of GUN1-mediated

586 communication between these two organelles. One is dependent on the accumulation  
587 of plastid preproteins in cytoplasm resulted from the impaired plastid protein import  
588 (Wu et al., 2019), another is associated with changes in tetrapyrrole metabolism  
589 (Shimizu et al., 2019). However, none of these two pathways is involved in the PCD  
590 phenotype in the *rab8d* SCN (Supplemental Figures 11 and 12).

591 Together, we raised a model for illustrating the *rab8d*-dependent root phenotype  
592 (Figure 8). In the root meristem region, ATM perceives the plastid signal triggered by  
593 the reduced function of Rab8d and affects the cell cycle through regulating the *SMR5*  
594 expression. Meanwhile, in the root SCN, GUN1 perceives the *rab8d*-dependent signal  
595 and triggers PCD through an unknown pathway. The injured SCN induces the  
596 expression of *ERF115* for replenishment of stem cells. Thus, our observations imply a  
597 crucial role for plastid translation dependent signals in regulating root growth.

## 598 MATERIALS AND METHODS

### 599 Plant materials and growth conditions

600 In this study, wild type is the *Arabidopsis thaliana* Columbia (Col-0) ecotype  
601 except for *gun1-8*, which was generated from *Col6-3* (Zhao et al., 2019). Mutants of  
602 *rab8d-1* (sail\_659\_g09), *rab8d-2* (salk\_069644), *rab8d-3* (sail\_415\_e05), *gun1-101*  
603 (sail\_33\_d01), and *cchl-1* (CS6499) were obtained from Arabidopsis Biological  
604 Resource Center. Mutants and transgenic marker lines of *WOX5pro:GFP* (Blilou et al.,  
605 2005), *cpGFP* (Wu et al., 2018), *DR5rev:GFP* (Friml et al., 2003), *SHRpro:SHR-GFP*  
606 (Nakajima et al., 2001), *SCRpro:SCR-GFP* (Sabatini et al., 2003), *PLT1pro:CFP*  
607 (Kutschmar et al., 2009), *PLT2pro:CFP* (Kutschmar et al., 2009), *SMR5pro:GUS* (Yi  
608 et al., 2014), *smr5* (Yi et al., 2014), *smr7* (Yi et al., 2014), *atm-2* (Garcia et al., 2003),  
609 *sog1-1* (Yoshiyama et al., 2009), *CycB1;1pro:GUS* (Su et al., 2017), *ERF115<sup>SRDX</sup>*  
610 (Heyman et al., 2013), *ERF115-OE* (Heyman et al., 2013), and  
611 *ERF115pro:NLS-GUS/GFP* (Heyman et al., 2016) have been described previously.

612 For the construction of *Rab8dpro:Rab8d-GFP* vector, the genomic DNA of  
613 *Rab8d* contained the encoding region (TGA free) and its upstream promoter (1510 bp)  
614 was cloned into the *pCAMBIA2300* empty vector. Then *GFP* was inserted at the

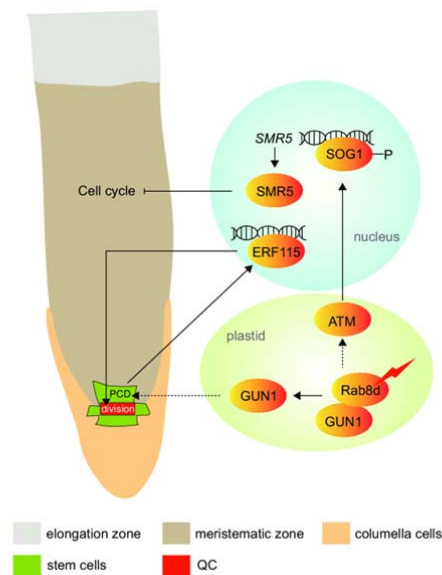

**Figure 8. A model for the *rab8d*-dependent signal in regulating root growth.**

In plastids, when the function of Rab8d is impaired, the derived signal can be perceived by ATM. The activation of ATM signaling phosphorylates a NAC transcription factor, SOG1, which targets to the *SMR5* gene and activates its expression in the root meristem region. The induced *SMR5* further inhibits the cell cycle. Meanwhile, GUN1 perceives the impaired Rab8d function and triggers the programmed death of stem cells. The expression of another transcription factor encoded by *ERF115* is highly induced by the injured SCN, which further stimulates the QC division for the replenishment of stem cells. Both GUN1 and *ERF115* are vital for the renewal of stem cells. Dotted lines indicate unknown pathways.

615 3'-end of *Rab8dpro:Rab8d*. The primers were listed in Supplemental Table 1. The  
616 *Rab8dpro:Rab8d-GFP* construct was introduced into wild type and *rab8d-2* using the  
617 *Agrobacterium tumefaciens* (GV3101)-mediated floral dip method. For selection of  
618 transgenic lines, 50  $\mu\text{g}/\text{mL}$  kanamycin was applied.

619 Surface-sterilized seeds were plated on solid 1/2 Murashige and Skoog (MS)  
620 medium (pH 5.7) containing 1% (w/v) sucrose. After stratification at 4°C for 3 d, the  
621 plates were transferred to a phytotron with 22°C and 16-h light/8-h dark conditions as  
622 described previously (Li et al., 2019). For the heat stress treatment, seedlings at 2, 3,  
623 or 5 DAG grown under normal growth conditions were transferred to an illumination  
624 incubator with 37°C and incubated for 4 h or with 30°C and incubated for 3 d  
625 according to the experimental demands. For the lincomycin treatment, seeds were  
626 plated on the medium described above containing 220 mg/L lincomycin (Sigma  
627 Aldrich).

628 **Microscopy**

629 For observing the root morphology, roots were stained with PI (5  $\mu\text{g}/\text{mL}$ ) for 5  
630 min and then transferred to the slides for microscopy. The observation methods for  
631 embryos and detection fluorescence signals have been described in our previous study  
632 (Li et al., 2019). The fluorescence was detected with a CLSM (FV1200, OLYMPUS).  
633 For the detection of PI signal, excitation wavelength of 555 nm and emission  
634 wavelength of 610 nm were used. For the detection of GFP signal, excitation  
635 wavelength of 476 nm and emission wavelength of 510 nm were used. For the  
636 detection of chlorophyll signal, excitation wavelength of 633 nm and emission  
637 wavelength of 710 nm were used. Fluorescence intensity was further analyzed with  
638 the software ImageJ (<https://imagej.nih.gov/ij/>). For taking the pictures of seedlings, a  
639 digital camera (Canon 600D) was employed. For obtaining the photos of GUS  
640 staining, a Leica DM4000B microscope was used.

#### 641 **GUS staining**

642 The method for GUS staining has been described previously (Li et al., 2016).  
643 The stained samples were incubated in the chloral hydrate solution (chloral  
644 hydrate/glycerol/water = 8:1:2, w/v/v) for 5 min and then transferred to the slides for  
645 microscopy.

#### 646 **EdU detection**

647 Seedlings at 5 DAG were incubated with 10  $\mu\text{M}$  EdU in liquid MS medium for 1  
648 h, then fixed with a 3.7% (w/v) formaldehyde solution in phosphate buffered saline  
649 (PBS) for 15 min. Fixed samples were washed with 3% BSA in PBS (w/v), treated  
650 with 0.5% Triton X-100 in PBS (v/v) for 20 min, then washed with 3% BSA in PBS  
651 (w/v) once more. The EdU detection for samples were according to manufacturer's  
652 instructions of a kit (Click-iT™ EdU Alexa Fluor™ 488 Imaging Kit, C10337).

#### 653 **Phenotype analyses**

654 Root length was measured from the root tip to the hypocotyl/root joint using  
655 ImageJ. Root meristem cell number was estimated by counting the cortical cells from  
656 the QC to the basal cell of the elongation region.

657 The intensity of cells at the S phase or the G2/M transition stage was calculated  
658 according to the following methods: the number of cells at the S or G2/M phase is

659 divided by the number of meristem cortical cells, and then the quantitative value  
660 multiplies 100%.

### 661 **RNA extraction, RNA sequencing, and qPCR**

662 RNA extraction was performed as described previously (Li et al., 2019). qPCR  
663 was performed on the 7500 Real-Time PCR system (Applied Biosystems) using a TB  
664 Green Premix EX Taq II (Tli RNaseH Plus) Kit (Takara). The calculation method for  
665 relative gene expression levels were performed as described previously (Li et al.,  
666 2019). Primers were listed in Supplemental Table 1. The high-throughput sequencing  
667 was performed on the BGISEQ-500 platform (Beijing Genomic Institution,  
668 [www.genomics.org.cn](http://www.genomics.org.cn)). The raw data of sequencing can be obtained from Sequence  
669 Read Archive of National Center for Biotechnology Information (accession number:  
670 PRJNA603637). The significantly differently expressed genes were isolated based on  
671 the fold change > 2 and adjusted *P* value < 0.001. The GO enrichment analysis was  
672 performed using the BiNGO plug-in of the Cytoscape software.

### 673 **CoIP assay**

674 For performing CoIP analysis on Rab8d, total native proteins were isolated from  
675 5 DAG seedlings of a homozygous transgenic line of *Rab8dpro:Rab8d-GFP* using a  
676 Minute Total Protein Extraction Kit for Plant Tissues (SN-009; Invent  
677 Biotechnologies) according to the user manual. Seedlings were grounded to fine  
678 powder in liquid nitrogen, and the powder was solubilized in the native extraction  
679 buffer supplied in the kit with addition of Complete Protease Inhibitor Cocktail  
680 (Roche). After incubation on ice for 10 min, the solution was centrifuged at 12,000g  
681 for 5 min at 4°C. The supernatant was collected and subsequently incubated with  
682 anti-GFP mAb Agarose (D153-8; MBL) for 120 min at 4°C (at room temperature for  
683 IP assays). After being washed with the extraction buffer for six times, the agarose  
684 beads were mixed with 2\*loading buffer and boiled for 10 min. Protein samples were  
685 isolated by gel electrophoresis and digested with the Trypsin enzyme. The digested  
686 peptides were separated with a Shimadzu LC-20AD model nanoliter liquid  
687 chromatograph and then passed to an ESI tandem mass spectrometer: TripleTOF 5600  
688 (SCIEX, Framingham, MA, USA). The ion source was Nanospray III source (SCIEX,

689 Framingham, MA, USA), and the emitter was a needle (New Objectives, Woburn,  
690 MA, USA) drawn from quartz material. For data acquisition, the mass spectrometer  
691 parameters were set as follows: ion source spray voltage 2,300V, nitrogen pressure 30  
692 psi, spray gas 15 and spray interface temperature 150 °C. Protein identification was  
693 performed with the Mascot Software V2.3 according to the database of *Arabidopsis*  
694 *thaliana* TAIR10. The raw data of mass spectrometry can be obtained from the  
695 PRIDE partner repository of the ProteomeXchange Consortium (accession number:  
696 PXD017331).

697 For performing IP assays on GUN1, the overexpression line of GUN1-GFP  
698 (OE-13) was employed. The protein samples of GUN1-GFP substrates were obtained  
699 according to the above method, separated with 10% SDS-PAGE, and then detected  
700 with anti-GFP (1:1000) for the input and with anti-Rab8d (1:500) for the output.

#### 701 **Antibodies**

702 The GFP commercial polyclonal antibody was obtained from ABMART (P30010,  
703 Shanghai, China). The Rab8d antibody was produced in rabbit with the whole protein  
704 as the antigen.

#### 705 **Accession numbers**

706 Sequence data from this article can be found in the Arabidopsis Genome  
707 Initiative database under the following accession numbers: *Rab8d*, AT4G20360;  
708 *SMR5*, AT1G07500; *ATM*, AT3G48190; *SOG1*, AT1G25580; *SMR7*, AT3G27630;  
709 *ERF115*, AT5G07310; *GUN1*, AT2G31400; *GUN5*, AT5G13630.

#### 710 **SUPPLEMENTAL DATA**

711 **Supplemental Figure 1.** *rab8d-3* is embryo lethal.

712 **Supplemental Figure 2.** Comparison of expression of the *Rab8d* gene among the  
713 indicated genotypes.

714 **Supplemental Figure 3.** The SCN phenotype treated with lincomycin.

715 **Supplemental Figure 4.** Rab8d protein aggregation under heat stress *in vivo*.

716 **Supplemental Figure 5.** Accumulation of PINs in *rab8d-2*.

717 **Supplemental Figure 6.** The effect of IAA and BR on root growth of *rab8d-2*.

718 **Supplemental Figure 7.** Comparison of FPKM values for the indicated genes  
719 between wild type and *rab8d-2*.

720 **Supplemental Figure 8.** Cell cycle detection in root tip of *rab8d-2*.

721 **Supplemental Figure 9.** Comparison of ROS accumulation between wild type and  
722 *rab8d-2*.

723 **Supplemental Figure 10.** Root architectures of *gun1-101 rab8d-1* and *gun1-101*  
724 *rab8d-2* at 12 DAG.

725 **Supplemental Figure 11.** GDA effect on phenotype of *gun1 rab8d*.

726 **Supplemental Figure 12.** The *gun5* effect on phenotypes of *rab8d-2*.

727 **Supplemental Table 1.** Primers used in this study.

728 **Supplemental Dataset 1.** Total genes detected by RNA-seq.

729 **Supplemental Dataset 2.** Differentially expressed genes detected by RNA-seq.

730 **Supplemental Dataset 3.** GO enrichment analysis on the upregulated genes in  
731 *rab8d-2*.

732 **Supplemental Dataset 4.** GO enrichment analysis on the downregulated genes in  
733 *rab8d-2*.

734 **Supplemental Dataset 5.** Rab8d substrates detected by CoIP.

735 **Supplemental Dataset 6.** KOG enrichment list of the Rab8d substrates.

736 **Supplemental Dataset 7.** The common substrates between Rab8d and GUN1.

### 737 **ACKNOWLEDGEMENTS**

738 The authors sincerely thank Zhaojun Ding for sharing *PIN1pro:PIN1-GFP*,  
739 *PIN2pro:PIN2-GFP*, *PIN3pro:PIN3-GFP*, *PIN7pro:PIN7-GFP*, *SCRpro:SCR-GFP*,  
740 *SHRpro:SHR-GFP*, and *DR5rev:GFP* lines, Lieven De Veylder for sharing the  
741 *ERF115pro:NLS-GFP*, *atm*, *ERF115-OE*, *SMR5pro:GUS*, *ERF115<sup>SRDX</sup>*, *smr5*, and  
742 *smr7* lines, Ralph Bock for sharing *cpGFP* and *GUN1-GFP (OE-13)* lines, Kaoru  
743 Yoshiyama for sharing *sog1-1*, and Xiaobo Zhao for sharing *gun1-8*. This work was  
744 supported by the National Natural Science Foundation of China (Grant No.  
745 31500257), the Agricultural scientific and technological innovation project of  
746 Shandong Academy of Agricultural Sciences (CXGC2018E13).

747 **AUTHOR CONTRIBUTIONS**

748 PL designed the research. PL, JM, and XS performed experiments. PL, JM, XS,  
749 CZ, CM, and XW analyzed the data. PL and XW wrote the paper.

750 **FIGURE LEGENDS**

751 **Figure 1. Root developmental phenotypes of the *rab8d* mutants.**

752 (A) Illustration of the *Rab8d* gene structures and positions of T-DNA insertions. The  
753 mutant names and corresponding accession numbers are indicated. (B) Phenotypes of  
754 3 DAG seedlings of the indicated lines. (C) Kinematic analyses of primary root  
755 growth of the indicated lines from 1 to 6 DAG. (D) Dynamic changes of meristem  
756 cell number of the indicated lines from 1 to 6 DAG. (E) Phenotypes of SCN of the  
757 indicated lines. Wild type<sup>Lin</sup> means a treatment with 220 mg/L lincomycin. Roots  
758 were stained with PI. The SCN is indicated in wild type with an irregular shape.  
759 Yellow arrowheads indicate the QC, and red ones indicate dead cells. (F) Expression  
760 patterns of *WOX5pro:GFP* in *rab8d-2* from 1 to 5 DAG. Bars are indicated.

761 **Figure 2. Expression patterns of *Rab8d* in embryos and roots.**

762 (A) Expression patterns of *Rab8d* in embryos from the octant stage to the  
763 cotyledonary stage. Chl, chlorophyll autofluorescence. (B) The accumulation of  
764 *Rab8d* protein in root tips of 3 DAG seedlings. White arrowheads indicate the QC.  
765 Bars are indicated.

766 **Figure 3. QC identity is lost in *rab8d-2*.**

767 (A) Expression of *DR5rev:GFP* in root tips of wild type and *rab8d-2* at 1, 3, and 5  
768 DAG. (B) GFP signal intensity was measured with the software ImageJ according to  
769 the arrow indicated in (A). The QC peak indicates the auxin maximum in QC of wild  
770 type roots. (C) Expression of *PLT1pro:CFP* and *PLT2pro:CFP* in root tips of 5 DAG  
771 seedlings of wild type and *rab8d-2*. (D) Expression of *SHRpro:SHR-GFP* and  
772 *SCRpro:SCR-GFP* in root tips of 5 DAG seedlings of wild type and *rab8d-2*. White  
773 arrowheads indicate QC. Bars = 50  $\mu$ m.

774 **Figure 4. *smr5* partially rescues the meristem phenotype of *rab8d-2*.**

775 (A) Comparison of expression level of *SMR5* and *SMR7* between wild type (set to 1)



776 and *rab8d-2*. The data was based on the FPKM values tested by RNA-seq. (B) The  
777 expression of *SMR5pro:GUS* in root tip of 5 DAG seedlings of wild type, *rab8d-2*,  
778 *atm-2 rab8d-2*, *sog1-1 rab8d-2*, and DPI-treated wild type (wild type<sup>DPI</sup>) and *rab8d-2*  
779 (*rab8d-2*<sup>DPI</sup>). White arrowheads indicate QC. (C) Phenotypes of 5 DAG seedlings of  
780 the indicated genotypes. (D) Comparison of root length among the indicated  
781 genotypes. Each spot represents an individual value, and black dashes indicate mean  
782 values. Significance analysis was performed using one-way ANOVA, and different  
783 lowercases indicate  $P < 0.0001$ . (E) Root tip phenotypes of 5 DAG seedlings of the  
784 indicated genotypes. White arrowheads indicate QC, green ones indicate the basal cell  
785 of the elongation region, and yellow ones indicate dead stem cells. The distance  
786 between white and green arrowheads indicate the meristem size.

787 **Figure 5. The function loss of *ERF115* inhibits the QC division in *rab8d-2*.**

788 (A) Comparison of expression level of *ERF115* between wild type (set to 1) and  
789 *rab8d-2*. The data was based on the FPKM values tested by RNA-seq. (B) The  
790 expression of *ERF115pro:NLS-GFP* in root tip of *rab8d-2* (from 1 to 5 DAG) and  
791 wild type (5 DAG). White arrowheads indicate QC. (C) Phenotypes of 5 DAG  
792 seedlings of the indicated genotypes. (D, E) Comparison of root length (D) and  
793 meristem cell number (E) among the indicated genotypes. Each spot represents an  
794 individual value. For (D), black dashes indicate mean values. For (E), data indicate  
795 mean  $\pm$  SD. Significance analysis was performed using *t* test. (F) SCN phenotypes of  
796 5 DAG seedlings of the indicated genotypes. White arrowheads indicate QC, and  
797 yellow ones indicate dead stem cells.

798 **Figure 6. Rab8d physically interacts with GUN1 *in vivo*.**

799 (A) Venn diagram indicates the common substrates (co-substrates) between Rab8d  
800 and GUN1. The Rab8d substrates were isolated from the *Rab8dpro:Rab8d-GFP*  
801 transgenic plants in the *rab8d-2* background. The published data for the GUN1  
802 substrates were employed. (B) Co-IP analysis indicates the interaction between GUN1  
803 and Rab8d *in vivo*. Dotted boxes indicate the bands of prey proteins. Red arrows  
804 indicate the bands of Rab8d.

805 **Figure 7. The function loss of GUN1 inhibits PCD in root stem cells of *rab8d-1*.**

806 (A) Phenotypes of the *gun1-101 rab8d-2* double mutant at 5 DAG. (B) Phenotypes of  
807 root tips of the *gun1-101 rab8d-2* and *gun1-8 rab8d-2* double mutants at 5 DAG. (C)  
808 Seedling phenotypes of the indicated genotypes at 5 DAG. (D) Comparison of root  
809 length among the indicated genotypes. Each spot represents an individual value, and  
810 black dashes indicate mean values. Significance analysis was performed using *t* test.  
811 (E) Phenotypes of root tips of the indicated genotypes at the indicated stages. White  
812 arrowheads indicate QC, green ones indicate the basal cell of elongation region, and  
813 yellow ones indicate dead cells. Note that, at 7 DAG, a large area of cells was dead in  
814 the transition/elongation zone.

815 **Figure 8. A model for the *rab8d*-dependent signal in regulating root growth.**

816 In plastids, when the function of Rab8d is impaired, the derived signal can be  
817 perceived by ATM. The activation of ATM signaling phosphorylates a NAC  
818 transcription factor, SOG1, which targets to the *SMR5* gene and activates its  
819 expression in the root meristem region. The induced *SMR5* further inhibits the cell  
820 cycle. Meanwhile, GUN1 perceives the impaired Rab8d function and triggers the  
821 programmed death of stem cells. The expression of another transcription factor  
822 encoded by *ERF115* is highly induced by the injured SCN, which further stimulates  
823 the QC division for the replenishment of stem cells. Both GUN1 and *ERF115* are vital  
824 for the renewal of stem cells. Dotted lines indicate unknown pathways.

825

## Parsed Citations

- Adhikari, N.D., Froehlich, J.E., Strand, D.D., Buck, S.M., Kramer, D.M., and Larkin, R.M. (2011).** GUN4-porphyrin complexes bind the ChlH/GUN5 subunit of Mg-Chelatase and promote chlorophyll biosynthesis in Arabidopsis. *Plant Cell* 23, 1449-1467.  
Pubmed: [Author and Title](#)  
Google Scholar: [Author Only Title Only Author and Title](#)
- Aida, M., Beis, D., Heidstra, R., Willemssen, V., Blilou, I., Galinha, C., Nussaume, L., Noh, Y.S., Amasino, R., and Scheres, B. (2004).** The PLETHORA genes mediate patterning of the Arabidopsis root stem cell niche. *Cell* 119, 109-120.  
Pubmed: [Author and Title](#)  
Google Scholar: [Author Only Title Only Author and Title](#)
- Blilou, I., Xu, J., Wildwater, M., Willemssen, V., Paponov, I., Friml, J., Heidstra, R., Aida, M., Palme, K., and Scheres, B. (2005).** The PIN auxin efflux facilitator network controls growth and patterning in Arabidopsis roots. *Nature* 433, 39-44.  
Pubmed: [Author and Title](#)  
Google Scholar: [Author Only Title Only Author and Title](#)
- Brumos, J., Robles, L.M., Yun, J., Vu, T.C., Jackson, S., Alonso, J.M., and Stepanova, A.N. (2018).** Local auxin biosynthesis is a key regulator of plant development. *Dev. Cell* 47, 306-318.  
Pubmed: [Author and Title](#)  
Google Scholar: [Author Only Title Only Author and Title](#)
- Cimprich, K.A., and Cortez, D. (2008).** ATR: an essential regulator of genome integrity. *Nat. Rev. Mol. Cell Biol.* 9, 616-627.  
Pubmed: [Author and Title](#)  
Google Scholar: [Author Only Title Only Author and Title](#)
- Cruz-Ramirez, A., Diaz-Trivino, S., Wachsman, G., Du, Y., Arteaga-Vazquez, M., Zhang, H., Benjamins, R., Blilou, I., Neef, A.B., Chandler, V., and Scheres, B. (2013).** A SCARECROW-RETINOBLASTOMA protein network controls protective quiescence in the Arabidopsis root stem cell organizer. *PLoS Biol.* 11, e1001724.  
Pubmed: [Author and Title](#)  
Google Scholar: [Author Only Title Only Author and Title](#)
- Cui, H., Levesque, M.P., Vernoux, T., Jung, J.W., Paquette, A.J., Gallagher, K.L., Wang, J.Y., Blilou, I., Scheres, B., and Benfey, P.N. (2007).** An evolutionarily conserved mechanism delimiting SHR movement defines a single layer of endodermis in plants. *Science* 316, 421-425.  
Pubmed: [Author and Title](#)  
Google Scholar: [Author Only Title Only Author and Title](#)
- Friml, J., Vieten, A., Sauer, M., Weijers, D., Schwarz, H., Hamann, T., Offringa, R., and Jurgens, G. (2003).** Efflux-dependent auxin gradients establish the apical-basal axis of Arabidopsis. *Nature* 426, 147-153.  
Pubmed: [Author and Title](#)  
Google Scholar: [Author Only Title Only Author and Title](#)
- Friml, J., Benkova, E., Blilou, I., Wisniewska, J., Hamann, T., Ljung, K., Woody, S., Sandberg, G., Scheres, B., Jurgens, G., and Palme, K. (2002).** AtPIN4 mediates sink-driven auxin gradients and root patterning in Arabidopsis. *Cell* 108, 661-673.  
Pubmed: [Author and Title](#)  
Google Scholar: [Author Only Title Only Author and Title](#)
- Fulcher, N., and Sablowski, R. (2009).** Hypersensitivity to DNA damage in plant stem cell niches. *Proc. Natl. Acad. Sci. USA* 106, 20984-20988.  
Pubmed: [Author and Title](#)  
Google Scholar: [Author Only Title Only Author and Title](#)
- Furukawa, T., Curtis, M.J., Tominey, C.M., Duong, Y.H., Wilcox, B.W., Aggoune, D., Hays, J.B., and Britt, A.B. (2010).** A shared DNA-damage-response pathway for induction of stem-cell death by UVB and by gamma irradiation. *DNA Repair (Amst)* 9, 940-948.  
Pubmed: [Author and Title](#)  
Google Scholar: [Author Only Title Only Author and Title](#)
- Galinha, C., Hofhuis, H., Luijten, M., Willemssen, V., Blilou, I., Heidstra, R., and Scheres, B. (2007).** PLETHORA proteins as dose-dependent master regulators of Arabidopsis root development. *Nature* 449, 1053-1057.  
Pubmed: [Author and Title](#)  
Google Scholar: [Author Only Title Only Author and Title](#)
- Garcia, V., Bruchet, H., Camescasse, D., Granier, F., Bouchez, D., and Tissier, A. (2003).** AtATM is essential for meiosis and the somatic response to DNA damage in plants. *Plant Cell* 15, 119-132.  
Pubmed: [Author and Title](#)  
Google Scholar: [Author Only Title Only Author and Title](#)
- Heyman, J., Cools, T., Vandebussche, F., Heyndrickx, K.S., Van Leene, J., Vercauteren, I., Vanderauwera, S., Vandepoele, K., De Jaeger, G., Van Der Straeten, D., and De Veylder, L. (2013).** ERF115 controls root quiescent center cell division and stem cell replenishment. *Science* 342, 860-863.  
Pubmed: [Author and Title](#)  
Google Scholar: [Author Only Title Only Author and Title](#)

Heyman, J., Cools, T., Canher, B., Shavialenka, S., Traas, J., Vercauteren, I., Van den Daele, H., Persiau, G., De Jaeger, G., Sugimoto, K., and De Veylder, L. (2016). The heterodimeric transcription factor complex ERF115-PAT1 grants regeneration competence. *Nat. Plants* 2, 16165.

Pubmed: [Author and Title](#)

Google Scholar: [Author Only Title Only Author and Title](#)

Hong, J.H., Savina, M., Du, J., Devendran, A., Kannivadi Ramakanth, K., Tian, X., Sim, W.S., Mironova, V.V., and Xu, J. (2017). A sacrifice-for-survival mechanism protects root stem cell niche from chilling stress. *Cell* 170, 102-113.

Pubmed: [Author and Title](#)

Google Scholar: [Author Only Title Only Author and Title](#)

Hu, Z., Cools, T., and De Veylder, L. (2016). Mechanisms used by plants to cope with DNA damage. *Annu. Rev. Plant Biol.* 67, 439-462.

Pubmed: [Author and Title](#)

Google Scholar: [Author Only Title Only Author and Title](#)

Johnson, R.A., Conklin, P.A., Tjahjadi, M., Missirian, V., Toal, T., Brady, S.M., and Britt, A.B. (2018). SUPPRESSOR OF GAMMA RESPONSE1 links DNA damage response to organ regeneration. *Plant Physiol.* 176, 1665-1675.

Pubmed: [Author and Title](#)

Google Scholar: [Author Only Title Only Author and Title](#)

Kleffmann, T., Russenberger, D., von Zychlinski, A., Christopher, W., Sjolander, K., Gruissem, W., and Baginsky, S. (2004). The *Arabidopsis thaliana* chloroplast proteome reveals pathway abundance and novel protein functions. *Curr. Biol.* 14, 354-362.

Pubmed: [Author and Title](#)

Google Scholar: [Author Only Title Only Author and Title](#)

Kutschmar, A., Rzewuski, G., Stuhrwohldt, N., Beemster, G.T., Inze, D., and Sauter, M. (2009). PSK-alpha promotes root growth in *Arabidopsis*. *New Phytol.* 181, 820-831.

Pubmed: [Author and Title](#)

Google Scholar: [Author Only Title Only Author and Title](#)

Levesque, M.P., Vernoux, T., Busch, W., Cui, H., Wang, J.Y., Blilou, I., Hassan, H., Nakajima, K., Matsumoto, N., Lohmann, J.U., Scheres, B., and Benfey, P.N. (2006). Whole-genome analysis of the SHORT-ROOT developmental pathway in *Arabidopsis*. *PLoS Biol.* 4, e143.

Pubmed: [Author and Title](#)

Google Scholar: [Author Only Title Only Author and Title](#)

Li, P.C., Yu, S.W., Li, K., Huang, J.G., Wang, X.J., and Zheng, C.C. (2016). The mutation of Glu at amino acid 3838 of AtMDN1 provokes pleiotropic developmental phenotypes in *Arabidopsis*. *Sci. Rep.* 6, 36446.

Pubmed: [Author and Title](#)

Google Scholar: [Author Only Title Only Author and Title](#)

Li, P.C., Li, K., Wang, J., Zhao, C.Z., Zhao, S.Z., Hou, L., Xia, H., Ma, C.L., and Wang, X.J. (2019). The AAA-ATPase MIDASIN 1 functions in ribosome biogenesis and is essential for embryo and root development. *Plant Physiol.* 180, 289-304.

Pubmed: [Author and Title](#)

Google Scholar: [Author Only Title Only Author and Title](#)

Li, X., Cai, C., Wang, Z., Fan, B., Zhu, C., and Chen, Z. (2018). Plastid translation elongation factor Tu is prone to heat-induced aggregation despite its critical role in plant heat tolerance. *Plant Physiol.* 176, 3027-3045.

Pubmed: [Author and Title](#)

Google Scholar: [Author Only Title Only Author and Title](#)

Lichocka, M., Rymaszewski, W., Morgiewicz, K., Barymow-Filoniuk, I., Chlebowski, A., Sobczak, M., Samuel, M.A., Schmelzer, E., Krzymowska, M., and Hennig, J. (2018). Nucleus- and plastid-targeted annexin 5 promotes reproductive development in *Arabidopsis* and is essential for pollen and embryo formation. *BMC Plant Biol.* 18, 183.

Pubmed: [Author and Title](#)

Google Scholar: [Author Only Title Only Author and Title](#)

Liu, S., Zheng, L., Jia, J., Guo, J., Zheng, M., Zhao, J., Shao, J., Liu, X., An, L., Yu, F., and Qi, Y. (2019). Chloroplast translation elongation factor EF-Tu/SVR11 is involved in var2-mediated leaf variegation and leaf development in *Arabidopsis*. *Front Plant Sci.* 10, 295.

Pubmed: [Author and Title](#)

Google Scholar: [Author Only Title Only Author and Title](#)

Marino, G., Naranjo, B., Wang, J., Penzler, J.F., Kleine, T., and Leister, D. (2019). Relationship of GUN1 to FUG1 in chloroplast protein homeostasis. *Plant J.* 99, 521-535.

Pubmed: [Author and Title](#)

Google Scholar: [Author Only Title Only Author and Title](#)

Maryanovich, M., Oberkovitz, G., Niv, H., Vorobiyov, L., Zaltsman, Y., Brenner, O., Lapidot, T., Jung, S., and Gross, A. (2012). The ATM-BID pathway regulates quiescence and survival of haematopoietic stem cells. *Nat. Cell Biol.* 14, 535-541.

Pubmed: [Author and Title](#)

Google Scholar: [Author Only Title Only Author and Title](#)

Mateo-Bonmati, E., Casanova-Saez, R., Quesada, V., Hricova, A., Candela, H., and Micol, J.L. (2015). Plastid control of abaxial-adaxial patterning. *Sci. Rep.* 5, 15975.

Pubmed: [Author and Title](#)

Google Scholar: [Author Only Title Only Author and Title](#)

- Moller, B., and Weijers, D. (2009). Auxin control of embryo patterning. Cold Spring Harb. Perspect. Biol. 1, a001545.**  
Pubmed: [Author and Title](#)  
Google Scholar: [Author Only Title Only Author and Title](#)
- Mussig, C., Shin, G.H., and Altmann, T. (2003). Brassinosteroids promote root growth in Arabidopsis. Plant Physiol. 133, 1261-1271.**  
Pubmed: [Author and Title](#)  
Google Scholar: [Author Only Title Only Author and Title](#)
- Nakajima, K., Sena, G., Nawy, T., and Benfey, P.N. (2001). Intercellular movement of the putative transcription factor SHR in root patterning. Nature 413, 307-311.**  
Pubmed: [Author and Title](#)  
Google Scholar: [Author Only Title Only Author and Title](#)
- Nakata, M.T., Sato, M., Wakazaki, M., Sato, N., Kojima, K., Sekine, A., Nakamura, S., Shikanai, T., Toyooka, K., Tsukaya, H., and Horiguchi, G. (2018). Plastid translation is essential for lateral root stem cell patterning in Arabidopsis thaliana. Bio. Open 7, bio028175.**  
Pubmed: [Author and Title](#)  
Google Scholar: [Author Only Title Only Author and Title](#)
- Peltier, J.B., Ytterberg, A.J., Sun, Q., and van Wijk, K.J. (2004). New functions of the thylakoid membrane proteome of Arabidopsis thaliana revealed by a simple, fast, and versatile fractionation strategy. J. Biol. Chem. 279, 49367-49383.**  
Pubmed: [Author and Title](#)  
Google Scholar: [Author Only Title Only Author and Title](#)
- Pesaresi, P., and Kim, C. (2019). Current understanding of GUN1: a key mediator involved in biogenic retrograde signaling. Plant Cell Rep. 38, 819-823.**  
Pubmed: [Author and Title](#)  
Google Scholar: [Author Only Title Only Author and Title](#)
- Pi, L., Aichinger, E., van der Graaff, E., Llavata-Peris, C.I., Weijers, D., Hennig, L., Groot, E., and Laux, T. (2015). Organizer-Derived WOX5 Signal Maintains Root Columella Stem Cells through Chromatin-Mediated Repression of CDF4 Expression. Dev. Cell 33, 576-588.**  
Pubmed: [Author and Title](#)  
Google Scholar: [Author Only Title Only Author and Title](#)
- Rich, T., Allen, R.L., and Wylie, A.H. (2000). Defying death after DNA damage. Nature 407, 777-783.**  
Pubmed: [Author and Title](#)  
Google Scholar: [Author Only Title Only Author and Title](#)
- Robert, H.S., Grones, P., Stepanova, A.N., Robles, L.M., Lokerse, A.S., Alonso, J.M., Weijers, D., and Friml, J. (2013). Local auxin sources orient the apical-basal axis in Arabidopsis embryos. Curr. Biol. 23, 2506-2512.**  
Pubmed: [Author and Title](#)  
Google Scholar: [Author Only Title Only Author and Title](#)
- Robert, H.S., Park, C., Gutierrez, C.L., Wojcikowska, B., Pencik, A., Novak, O., Chen, J., Grunewald, W., Dresselhaus, T., Friml, J., and Laux, T. (2018). Maternal auxin supply contributes to early embryo patterning in Arabidopsis. Nat. Plants 4, 548-553.**  
Pubmed: [Author and Title](#)  
Google Scholar: [Author Only Title Only Author and Title](#)
- Sabatini, S., Heidstra, R., Wildwater, M., and Scheres, B. (2003). SCARECROW is involved in positioning the stem cell niche in the Arabidopsis root meristem. Genes Dev. 17, 354-358.**  
Pubmed: [Author and Title](#)  
Google Scholar: [Author Only Title Only Author and Title](#)
- Sabatini, S., Beis, D., Wolkenfelt, H., Murfett, J., Guilfoyle, T., Malamy, J., Benfey, P., Leyser, O., Bechtold, N., Weisbeek, P., and Scheres, B. (1999). An auxin-dependent distal organizer of pattern and polarity in the Arabidopsis root. Cell 99, 463-472.**  
Pubmed: [Author and Title](#)  
Google Scholar: [Author Only Title Only Author and Title](#)
- Sarkar, A.K., Luijten, M., Miyashima, S., Lenhard, M., Hashimoto, T., Nakajima, K., Scheres, B., Heidstra, R., and Laux, T. (2007). Conserved factors regulate signalling in Arabidopsis thaliana shoot and root stem cell organizers. Nature 446, 811-814.**  
Pubmed: [Author and Title](#)  
Google Scholar: [Author Only Title Only Author and Title](#)
- Scheres, B., Wolkenfelt, H., Willemsen, V., Terlouw, M., Lawson, E., Dean, C., and Weisbeek, P. (1994). Embryonic origin of the Arabidopsis primary root and root meristem initials. Development 120, 2475-2487.**  
Pubmed: [Author and Title](#)  
Google Scholar: [Author Only Title Only Author and Title](#)
- Shiloh, Y. (2006). The ATM-mediated DNA-damage response: taking shape. Trends Biochem. Sci. 31, 402-410.**  
Pubmed: [Author and Title](#)  
Google Scholar: [Author Only Title Only Author and Title](#)
- Shimizu, T., Kacprzak, S.M., Mochizuki, N., Nagatani, A., Watanabe, S., Shimada, T., Tanaka, K., Hayashi, Y., Arai, M., Leister, D., Okamoto, H., Terry, M.J., and Masuda, T. (2019). The retrograde signaling protein GUN1 regulates tetrapyrrole biosynthesis. Proc. Natl.**

**Acad. Sci. USA 116, 24900-24906.**

Pubmed: [Author and Title](#)

Google Scholar: [Author Only Title Only Author and Title](#)

**Shimotohno, A., Heidstra, R., Bliou, I., and Scheres, B. (2018). Root stem cell niche organizer specification by molecular convergence of PLETHORA and SCARECROW transcription factor modules. Genes Dev. 32, 1085-1100.**

Pubmed: [Author and Title](#)

Google Scholar: [Author Only Title Only Author and Title](#)

**Su, C., Zhao, H., Zhao, Y., Ji, H., Wang, Y., Zhi, L., and Li, X. (2017). RUG3 and ATM synergistically regulate the alternative splicing of mitochondrial nad2 and the DNA damage response in Arabidopsis thaliana. Sci. Rep. 7, 43897.**

Pubmed: [Author and Title](#)

Google Scholar: [Author Only Title Only Author and Title](#)

**Susek, R.E., Ausubel, F.M., and Chory, J. (1993). Signal transduction mutants of Arabidopsis uncouple nuclear CAB and RBCS gene expression from chloroplast development. Cell 74, 787-799.**

Pubmed: [Author and Title](#)

Google Scholar: [Author Only Title Only Author and Title](#)

**Tadini, L., Pesaresi, P., Kleine, T., Rossi, F., Guljamow, A., Sommer, F., Muhlhaut, T., Schroda, M., Masiero, S., Pribil, M., Rothbart, M., Hedtke, B., Grimm, B., and Leister, D. (2016). GUN1 Controls Accumulation of the Plastid Ribosomal Protein S1 at the Protein Level and Interacts with Proteins Involved in Plastid Protein Homeostasis. Plant Physiol. 170, 1817-1830.**

Pubmed: [Author and Title](#)

Google Scholar: [Author Only Title Only Author and Title](#)

**Valentin-Vega, Y.A., Maclean, K.H., Tait-Mulder, J., Milasta, S., Steeves, M., Dorsey, F.C., Cleveland, J.L., Green, D.R., and Kastan, M.B. (2012). Mitochondrial dysfunction in ataxia-telangiectasia. Blood 119, 1490-1500.**

Pubmed: [Author and Title](#)

Google Scholar: [Author Only Title Only Author and Title](#)

**van den Berg, C., Willemsen, V., Hendriks, G., Weisbeek, P., and Scheres, B. (1997). Short-range control of cell differentiation in the Arabidopsis root meristem. Nature 390, 287-289.**

Pubmed: [Author and Title](#)

Google Scholar: [Author Only Title Only Author and Title](#)

**Waterworth, W.M., Footitt, S., Bray, C.M., Finch-Savage, W.E., and West, C.E. (2016). DNA damage checkpoint kinase ATM regulates germination and maintains genome stability in seeds. Proc. Natl. Acad. Sci. USA 113, 9647-9652.**

Pubmed: [Author and Title](#)

Google Scholar: [Author Only Title Only Author and Title](#)

**Wildwater, M., Campilho, A., Perez-Perez, J.M., Heidstra, R., Bliou, I., Korthout, H., Chatterjee, J., Mariconti, L., Grisse, W., and Scheres, B. (2005). The RETINOBLASTOMA-RELATED gene regulates stem cell maintenance in Arabidopsis roots. Cell 123, 1337-1349.**

Pubmed: [Author and Title](#)

Google Scholar: [Author Only Title Only Author and Title](#)

**Wu, G.Z., Chalvin, C., Hoelscher, M., Meyer, E.H., Wu, X.N., and Bock, R. (2018). Control of retrograde signaling by rapid turnover of GENOMES UNCOUPLED1. Plant Physiol. 176, 2472-2495.**

Pubmed: [Author and Title](#)

Google Scholar: [Author Only Title Only Author and Title](#)

**Wu, G.Z., Meyer, E.H., Richter, A.S., Schuster, M., Ling, Q., Schottler, M.A., Walther, D., Zoschke, R., Grimm, B., Jarvis, R.P., and Bock, R. (2019). Control of retrograde signalling by protein import and cytosolic folding stress. Nat. Plants 5, 525-538.**

Pubmed: [Author and Title](#)

Google Scholar: [Author Only Title Only Author and Title](#)

**Yi, D., Alvim Kamei, C.L., Cools, T., Vanderauwera, S., Takahashi, N., Okushima, Y., Eekhout, T., Yoshiyama, K.O., Larkin, J., Van den Daele, H., Conklin, P., Britt, A., Umeda, M., and De Veylder, L. (2014). The Arabidopsis SIAMESE-RELATED cyclin-dependent kinase inhibitors SMR5 and SMR7 regulate the DNA damage checkpoint in response to reactive oxygen species. Plant Cell 26, 296-309.**

Pubmed: [Author and Title](#)

Google Scholar: [Author Only Title Only Author and Title](#)

**Yoshiyama, K., Conklin, P.A., Huefner, N.D., and Britt, A.B. (2009). Suppressor of gamma response 1 (SOG1) encodes a putative transcription factor governing multiple responses to DNA damage. Proc. Natl. Acad. Sci. USA 106, 12843-12848.**

Pubmed: [Author and Title](#)

Google Scholar: [Author Only Title Only Author and Title](#)

**Yoshiyama, K.O. (2016). SOG1: a master regulator of the DNA damage response in plants. Genes Genet. Syst. 90, 209-216.**

Pubmed: [Author and Title](#)

Google Scholar: [Author Only Title Only Author and Title](#)

**Yoshiyama, K.O., Kobayashi, J., Ogita, N., Ueda, M., Kimura, S., Maki, H., and Umeda, M. (2013). ATM-mediated phosphorylation of SOG1 is essential for the DNA damage response in Arabidopsis. EMBO Rep. 14, 817-822.**

Pubmed: [Author and Title](#)

Google Scholar: [Author Only Title Only Author and Title](#)

**Zhang, Y., Jiao, Y., Liu, Z., and Zhu, Y.X. (2015). ROW1 maintains quiescent centre identity by confining WOX5 expression to specific cells. Nat. Commun. 6, 6003.**

Pubmed: [Author and Title](#)

Google Scholar: [Author Only](#) [Title Only](#) [Author and Title](#)

**Zhao, X., Huang, J., and Chory, J. (2019). GUN1 interacts with MORF2 to regulate plastid RNA editing during retrograde signaling. Proc. Natl. Acad. Sci. USA 116, 10162-10167.**

Pubmed: [Author and Title](#)

Google Scholar: [Author Only](#) [Title Only](#) [Author and Title](#)

**Zheng, M., Liu, X., Liang, S., Fu, S., Qi, Y., Zhao, J., Shao, J., An, L., and Yu, F. (2016). Chloroplast translation initiation factors regulate leaf variegation and development. Plant Physiol. 172, 1117-1130.**

Pubmed: [Author and Title](#)

Google Scholar: [Author Only](#) [Title Only](#) [Author and Title](#)
